# Supplementary material
Source: PubMed Central journal article supplement (PMC5297391)
Supplement: NIHMS843367-supplement-Appendix.pdf [file NIHMS843367-supplement-Appendix.pdf]

**Web Appendix for 'Comparison of Two Correlated  
ROC Curves at a Given Specificity or Sensitivity  
Level' by Leonidas E. Bantis and Ziding Feng**

## Web-Appendix A (Simulation results)

Table 1: Comparison of sizes of  $Z$  and  $Z^*$  tests. Simulation results of 1000 replications for the scenario in which data representing diseased and healthy individuals are generated by the same bivariate normal distributions (valid null hypothesis since  $ROC_1(t) = ROC_2(t)$ ). The data are generated such that  $AUC_1 = AUC_2 = 0.6, 0.7$ , and  $0.8$ . Normality is also assumed for estimation. Sample sizes explored are  $(100, 100)$ ,  $(200, 200)$  and  $(100, 200)$ . Correlation is set equal to  $\rho = 0.2, 0.4, 0.6$  for the data of both the healthy and diseased individuals.

|            |        | Size results    |           |           |           |           |            |           |           |           |  |
|------------|--------|-----------------|-----------|-----------|-----------|-----------|------------|-----------|-----------|-----------|--|
| $n_A, n_B$ | $\rho$ | $AUC_1 = AUC_2$ | $Z$ test  |           |           |           | $Z^*$ test |           |           |           |  |
|            |        |                 | $t = 0.2$ | $t = 0.4$ | $t = 0.6$ | $t = 0.8$ | $t = 0.2$  | $t = 0.4$ | $t = 0.6$ | $t = 0.8$ |  |
| 100, 100   | 0.2    | 0.6             | 0.051     | 0.054     | 0.056     | 0.046     | 0.048      | 0.053     | 0.054     | 0.048     |  |
|            |        | 0.7             | 0.051     | 0.055     | 0.056     | 0.040     | 0.049      | 0.055     | 0.055     | 0.051     |  |
|            |        | 0.8             | 0.050     | 0.058     | 0.044     | 0.018     | 0.049      | 0.060     | 0.057     | 0.051     |  |
|            | 0.4    | 0.6             | 0.057     | 0.055     | 0.055     | 0.049     | 0.051      | 0.053     | 0.053     | 0.049     |  |
|            |        | 0.7             | 0.049     | 0.052     | 0.048     | 0.032     | 0.047      | 0.052     | 0.049     | 0.046     |  |
|            |        | 0.8             | 0.048     | 0.058     | 0.047     | 0.011     | 0.048      | 0.059     | 0.055     | 0.050     |  |
|            | 0.6    | 0.6             | 0.052     | 0.052     | 0.057     | 0.041     | 0.051      | 0.052     | 0.055     | 0.045     |  |
|            |        | 0.7             | 0.049     | 0.050     | 0.048     | 0.027     | 0.045      | 0.050     | 0.050     | 0.045     |  |
|            |        | 0.8             | 0.047     | 0.050     | 0.036     | 0.010     | 0.046      | 0.054     | 0.050     | 0.045     |  |
| 200, 200   | 0.2    | 0.6             | 0.056     | 0.060     | 0.062     | 0.059     | 0.054      | 0.060     | 0.062     | 0.060     |  |
|            |        | 0.7             | 0.057     | 0.057     | 0.060     | 0.051     | 0.053      | 0.057     | 0.059     | 0.061     |  |
|            |        | 0.8             | 0.051     | 0.059     | 0.054     | 0.043     | 0.049      | 0.059     | 0.063     | 0.063     |  |
|            | 0.4    | 0.6             | 0.052     | 0.066     | 0.065     | 0.056     | 0.051      | 0.065     | 0.065     | 0.058     |  |
|            |        | 0.7             | 0.057     | 0.058     | 0.060     | 0.046     | 0.056      | 0.058     | 0.060     | 0.056     |  |
|            |        | 0.8             | 0.057     | 0.060     | 0.054     | 0.035     | 0.055      | 0.060     | 0.061     | 0.061     |  |
|            | 0.6    | 0.6             | 0.050     | 0.064     | 0.059     | 0.045     | 0.050      | 0.064     | 0.058     | 0.047     |  |
|            |        | 0.7             | 0.055     | 0.059     | 0.055     | 0.039     | 0.055      | 0.059     | 0.055     | 0.052     |  |
|            |        | 0.8             | 0.053     | 0.050     | 0.050     | 0.032     | 0.053      | 0.049     | 0.060     | 0.058     |  |
| 100, 200   | 0.2    | 0.6             | 0.049     | 0.049     | 0.045     | 0.052     | 0.046      | 0.048     | 0.043     | 0.051     |  |
|            |        | 0.7             | 0.056     | 0.049     | 0.047     | 0.042     | 0.055      | 0.049     | 0.048     | 0.048     |  |
|            |        | 0.8             | 0.057     | 0.040     | 0.040     | 0.024     | 0.056      | 0.043     | 0.046     | 0.050     |  |
|            | 0.4    | 0.6             | 0.056     | 0.040     | 0.044     | 0.045     | 0.051      | 0.040     | 0.044     | 0.045     |  |
|            |        | 0.7             | 0.056     | 0.042     | 0.041     | 0.040     | 0.054      | 0.044     | 0.041     | 0.046     |  |
|            |        | 0.8             | 0.056     | 0.041     | 0.038     | 0.024     | 0.058      | 0.041     | 0.042     | 0.047     |  |
|            | 0.6    | 0.6             | 0.054     | 0.035     | 0.043     | 0.042     | 0.051      | 0.035     | 0.044     | 0.042     |  |
|            |        | 0.7             | 0.054     | 0.044     | 0.040     | 0.041     | 0.053      | 0.045     | 0.039     | 0.043     |  |
|            |        | 0.8             | 0.052     | 0.042     | 0.032     | 0.023     | 0.056      | 0.043     | 0.046     | 0.050     |  |

Table 2: Comparison of the power of  $Z$  and  $Z^*$  tests. Simulation results of 1000 replications for the normal setting (non-valid null hypothesis) under different scenarios. Normality is also assumed for estimation. Sample sizes explored are (100, 100), (200, 200), (300, 300), and (100, 300). Correlation is set equal to  $\rho = 0.2, 0.4$ , and  $0.6$  for the data of both the healthy and diseased individuals. The true difference  $ROC_2(t) - ROC_1(t)$  to be detected is denoted by  $d$ .

|                    |        | Power results |             |             |             |             |             |             |             |
|--------------------|--------|---------------|-------------|-------------|-------------|-------------|-------------|-------------|-------------|
|                    |        | $Z$ test      |             |             |             | $Z^*$ test  |             |             |             |
| $n_A, n_B$         | $\rho$ | $t = 0.540$   | $t = 0.648$ | $t = 0.753$ | $t = 0.863$ | $t = 0.540$ | $t = 0.648$ | $t = 0.753$ | $t = 0.863$ |
|                    |        | $d = 0.20$    | $d = 0.15$  | $d = 0.10$  | $d = 0.05$  | $d = 0.20$  | $d = 0.15$  | $d = 0.10$  | $d = 0.05$  |
| Assuming Normality |        |               |             |             |             |             |             |             |             |
| 50, 50             | 0.2    | 0.786         | 0.704       | 0.523       | 0.203       | 0.812       | 0.756       | 0.702       | 0.624       |
|                    | 0.4    | 0.872         | 0.796       | 0.585       | 0.216       | 0.897       | 0.863       | 0.800       | 0.6920      |
|                    | 0.6    | 0.970         | 0.913       | 0.694       | 0.245       | 0.977       | 0.964       | 0.925       | 0.8390      |
| 100, 100           | 0.2    | 0.975         | 0.963       | 0.918       | 0.713       | 0.978       | 0.971       | 0.951       | 0.900       |
|                    | 0.4    | 0.993         | 0.988       | 0.962       | 0.770       | 0.993       | 0.991       | 0.980       | 0.949       |
|                    | 0.6    | 1.000         | 0.997       | 0.989       | 0.862       | 1.000       | 0.999       | 0.995       | 0.986       |
| 200, 200           | 0.2    | 1.000         | 0.999       | 0.999       | 0.980       | 1.000       | 0.999       | 0.999       | 0.991       |
|                    | 0.4    | 1.000         | 1.000       | 1.000       | 0.994       | 1.000       | 1.000       | 1.000       | 0.999       |
|                    | 0.6    | 1.000         | 1.000       | 1.000       | 1.000       | 1.000       | 1.000       | 1.000       | 1.000       |
| Box-Cox            |        |               |             |             |             |             |             |             |             |
| 50, 50             | 0.2    | 0.769         | 0.655       | 0.486       | 0.181       | 0.755       | 0.692       | 0.602       | 0.505       |
|                    | 0.4    | 0.861         | 0.745       | 0.543       | 0.192       | 0.866       | 0.788       | 0.690       | 0.564       |
|                    | 0.6    | 0.933         | 0.859       | 0.626       | 0.223       | 0.939       | 0.899       | 0.825       | 0.696       |
| 100, 100           | 0.2    | 0.972         | 0.953       | 0.891       | 0.656       | 0.970       | 0.961       | 0.909       | 0.825       |
|                    | 0.4    | 0.991         | 0.979       | 0.930       | 0.696       | 0.988       | 0.977       | 0.957       | 0.879       |
|                    | 0.6    | 1.000         | 0.996       | 0.979       | 0.782       | 0.998       | 0.993       | 0.984       | 0.946       |
| 200, 200           | 0.2    | 1.000         | 1.000       | 0.993       | 0.960       | 1.000       | 1.000       | 0.994       | 0.978       |
|                    | 0.4    | 1.000         | 1.000       | 1.000       | 0.982       | 0.999       | 0.998       | 0.998       | 0.991       |
|                    | 0.6    | 1.000         | 1.000       | 1.000       | 0.999       | 1.000       | 1.000       | 1.000       | 0.999       |

Table 3: Comparison of sizes of  $Z$  and  $Z^*$  tests. Simulation results of 1000 replications where data representing the diseased and healthy individuals are generated by the same bivariate normal distributions (valid null hypothesis). The data are generated such that  $AUC_1 = AUC_2 = 0.6, 0.7, \text{ and } 0.8$ . The Box-Cox approach is used for estimation. Sample sizes explored are  $(100, 100)$ ,  $(200, 200)$  and  $(100, 200)$ . Correlation is set equal to  $\rho = 0.2, 0.4$ , and  $0.6$  for the data of both the healthy and diseased individuals.

|            |        | Size results    |           |           |           |           |            |           |           |           |  |
|------------|--------|-----------------|-----------|-----------|-----------|-----------|------------|-----------|-----------|-----------|--|
| $n_A, n_B$ | $\rho$ | $AUC_1 = AUC_2$ | $Z$ test  |           |           |           | $Z^*$ test |           |           |           |  |
|            |        |                 | $t = 0.2$ | $t = 0.4$ | $t = 0.6$ | $t = 0.8$ | $t = 0.2$  | $t = 0.4$ | $t = 0.6$ | $t = 0.8$ |  |
| 100, 100   | 0.2    | 0.6             | 0.054     | 0.055     | 0.058     | 0.037     | 0.047      | 0.054     | 0.057     | 0.039     |  |
|            |        | 0.7             | 0.054     | 0.056     | 0.049     | 0.035     | 0.047      | 0.053     | 0.051     | 0.040     |  |
|            |        | 0.8             | 0.052     | 0.057     | 0.049     | 0.025     | 0.047      | 0.049     | 0.045     | 0.045     |  |
|            | 0.4    | 0.6             | 0.053     | 0.053     | 0.054     | 0.039     | 0.049      | 0.051     | 0.049     | 0.041     |  |
|            |        | 0.7             | 0.048     | 0.055     | 0.047     | 0.035     | 0.044      | 0.052     | 0.047     | 0.040     |  |
|            |        | 0.8             | 0.048     | 0.051     | 0.045     | 0.015     | 0.046      | 0.050     | 0.045     | 0.045     |  |
|            | 0.6    | 0.6             | 0.060     | 0.057     | 0.054     | 0.038     | 0.054      | 0.051     | 0.051     | 0.044     |  |
|            |        | 0.7             | 0.051     | 0.056     | 0.047     | 0.022     | 0.046      | 0.053     | 0.051     | 0.035     |  |
|            |        | 0.8             | 0.045     | 0.050     | 0.031     | 0.012     | 0.045      | 0.049     | 0.046     | 0.039     |  |
| 200, 200   | 0.2    | 0.6             | 0.054     | 0.061     | 0.061     | 0.056     | 0.053      | 0.059     | 0.058     | 0.055     |  |
|            |        | 0.7             | 0.054     | 0.059     | 0.056     | 0.054     | 0.051      | 0.058     | 0.058     | 0.060     |  |
|            |        | 0.8             | 0.050     | 0.061     | 0.062     | 0.050     | 0.050      | 0.062     | 0.061     | 0.058     |  |
|            | 0.4    | 0.6             | 0.050     | 0.064     | 0.063     | 0.056     | 0.047      | 0.064     | 0.062     | 0.054     |  |
|            |        | 0.7             | 0.055     | 0.057     | 0.060     | 0.050     | 0.049      | 0.056     | 0.057     | 0.053     |  |
|            |        | 0.8             | 0.060     | 0.060     | 0.058     | 0.041     | 0.053      | 0.062     | 0.057     | 0.052     |  |
|            | 0.6    | 0.6             | 0.051     | 0.063     | 0.060     | 0.047     | 0.043      | 0.064     | 0.062     | 0.049     |  |
|            |        | 0.7             | 0.052     | 0.059     | 0.055     | 0.042     | 0.045      | 0.057     | 0.056     | 0.053     |  |
|            |        | 0.8             | 0.057     | 0.055     | 0.053     | 0.033     | 0.054      | 0.057     | 0.053     | 0.052     |  |
| 100, 200   | 0.2    | 0.6             | 0.053     | 0.047     | 0.047     | 0.047     | 0.052      | 0.047     | 0.050     | 0.052     |  |
|            |        | 0.7             | 0.060     | 0.050     | 0.049     | 0.047     | 0.053      | 0.049     | 0.045     | 0.046     |  |
|            |        | 0.8             | 0.056     | 0.045     | 0.044     | 0.027     | 0.056      | 0.045     | 0.046     | 0.044     |  |
|            | 0.4    | 0.6             | 0.056     | 0.042     | 0.048     | 0.051     | 0.045      | 0.041     | 0.045     | 0.051     |  |
|            |        | 0.7             | 0.059     | 0.043     | 0.040     | 0.047     | 0.055      | 0.044     | 0.044     | 0.054     |  |
|            |        | 0.8             | 0.053     | 0.046     | 0.043     | 0.028     | 0.053      | 0.044     | 0.048     | 0.044     |  |
|            | 0.6    | 0.6             | 0.055     | 0.038     | 0.042     | 0.047     | 0.043      | 0.037     | 0.045     | 0.050     |  |
|            |        | 0.7             | 0.054     | 0.046     | 0.047     | 0.045     | 0.045      | 0.044     | 0.045     | 0.051     |  |
|            |        | 0.8             | 0.053     | 0.043     | 0.047     | 0.023     | 0.052      | 0.045     | 0.041     | 0.040     |  |

Table 4: Exploration of  $Z^*$  test size. Simulation results of 1000 replications where data representing the diseased and healthy individuals are generated by bivariate lognormal and bivariate gamma distributions (valid null hypothesis). The data are generated such that  $AUC_1 = AUC_2 = 0.6, 0.7, \text{ and } 0.8$ . The Box-Cox approach is used for estimation. Sample sizes explored are (100, 100), (200, 200) and (100, 200). Correlation is set equal to  $\rho = 0.2, 0.4$ , and 0.6 for the data of both the healthy and diseased individuals.

|            |        | Size results (Box-Cox) |                  |           |           |           |                      |           |           |           |
|------------|--------|------------------------|------------------|-----------|-----------|-----------|----------------------|-----------|-----------|-----------|
| $n_A, n_B$ | $\rho$ | $AUC_1 = AUC_2$        | Bivariate Gammas |           |           |           | Bivariate Lognormals |           |           |           |
|            |        |                        | $t = 0.2$        | $t = 0.4$ | $t = 0.6$ | $t = 0.8$ | $t = 0.2$            | $t = 0.4$ | $t = 0.6$ | $t = 0.8$ |
| 100, 100   | 0.2    | 0.6                    | 0.042            | 0.051     | 0.047     | 0.054     | 0.054                | 0.055     | 0.058     | 0.043     |
|            |        | 0.7                    | 0.045            | 0.042     | 0.049     | 0.049     | 0.060                | 0.057     | 0.055     | 0.043     |
|            |        | 0.8                    | 0.045            | 0.049     | 0.039     | 0.043     | 0.060                | 0.055     | 0.043     | 0.035     |
|            | 0.4    | 0.6                    | 0.030            | 0.039     | 0.046     | 0.045     | 0.057                | 0.056     | 0.058     | 0.050     |
|            |        | 0.7                    | 0.041            | 0.042     | 0.049     | 0.044     | 0.055                | 0.052     | 0.047     | 0.039     |
|            |        | 0.8                    | 0.039            | 0.050     | 0.048     | 0.046     | 0.054                | 0.054     | 0.048     | 0.035     |
|            | 0.6    | 0.6                    | 0.025            | 0.050     | 0.051     | 0.042     | 0.059                | 0.054     | 0.059     | 0.046     |
|            |        | 0.7                    | 0.036            | 0.051     | 0.058     | 0.048     | 0.054                | 0.053     | 0.051     | 0.038     |
|            |        | 0.8                    | 0.047            | 0.049     | 0.041     | 0.036     | 0.052                | 0.051     | 0.039     | 0.033     |
| 200, 200   | 0.2    | 0.6                    | 0.048            | 0.059     | 0.057     | 0.054     | 0.069                | 0.079     | 0.082     | 0.068     |
|            |        | 0.7                    | 0.047            | 0.051     | 0.049     | 0.047     | 0.062                | 0.071     | 0.071     | 0.058     |
|            |        | 0.8                    | 0.044            | 0.049     | 0.048     | 0.039     | 0.066                | 0.065     | 0.067     | 0.055     |
|            | 0.4    | 0.6                    | 0.038            | 0.050     | 0.055     | 0.049     | 0.055                | 0.068     | 0.071     | 0.060     |
|            |        | 0.7                    | 0.045            | 0.040     | 0.033     | 0.033     | 0.058                | 0.062     | 0.060     | 0.051     |
|            |        | 0.8                    | 0.044            | 0.054     | 0.047     | 0.043     | 0.062                | 0.062     | 0.059     | 0.053     |
|            | 0.6    | 0.6                    | 0.036            | 0.045     | 0.051     | 0.051     | 0.054                | 0.065     | 0.062     | 0.046     |
|            |        | 0.7                    | 0.033            | 0.042     | 0.044     | 0.041     | 0.057                | 0.057     | 0.058     | 0.044     |
|            |        | 0.8                    | 0.036            | 0.040     | 0.044     | 0.043     | 0.057                | 0.053     | 0.057     | 0.051     |
| 100, 200   | 0.2    | 0.6                    | 0.039            | 0.040     | 0.052     | 0.053     | 0.065                | 0.056     | 0.050     | 0.051     |
|            |        | 0.7                    | 0.039            | 0.049     | 0.048     | 0.045     | 0.061                | 0.054     | 0.052     | 0.051     |
|            |        | 0.8                    | 0.044            | 0.049     | 0.048     | 0.045     | 0.068                | 0.053     | 0.048     | 0.050     |
|            | 0.4    | 0.6                    | 0.034            | 0.041     | 0.037     | 0.054     | 0.058                | 0.054     | 0.047     | 0.050     |
|            |        | 0.7                    | 0.041            | 0.049     | 0.045     | 0.040     | 0.055                | 0.052     | 0.044     | 0.052     |
|            |        | 0.8                    | 0.045            | 0.042     | 0.038     | 0.032     | 0.055                | 0.043     | 0.047     | 0.047     |
|            | 0.6    | 0.6                    | 0.038            | 0.044     | 0.051     | 0.053     | 0.049                | 0.041     | 0.044     | 0.044     |
|            |        | 0.7                    | 0.029            | 0.041     | 0.042     | 0.045     | 0.052                | 0.051     | 0.042     | 0.042     |
|            |        | 0.8                    | 0.037            | 0.041     | 0.038     | 0.042     | 0.051                | 0.041     | 0.046     | 0.040     |

Table 5: Power simulation results of 1000 replications for the non-normal settings (non-valid null hypothesis) under different scenarios. The kernel-based method is considered for estimation. Sample sizes explored are (100, 100), (200, 200), (300, 300), and (100, 300). Correlation is set equal to  $\rho = 0.2, 0.4$ , and  $0.6$  for data of both the healthy and diseased individuals. The true difference  $ROC_2(t) - ROC_1(t)$  to be detected is denoted by  $d$ .

| Power results         |        |                           |                           |                           |                           |                            |                            |                            |                           |
|-----------------------|--------|---------------------------|---------------------------|---------------------------|---------------------------|----------------------------|----------------------------|----------------------------|---------------------------|
| $n_A, n_B$            | $\rho$ | Bivariate Gammas          |                           |                           |                           | Bivariate Lognormals       |                            |                            |                           |
|                       |        | $t = 0.540$<br>$d = 0.20$ | $t = 0.648$<br>$d = 0.15$ | $t = 0.753$<br>$d = 0.10$ | $t = 0.863$<br>$d = 0.05$ | $t = 0.3790$<br>$d = 0.20$ | $t = 0.5350$<br>$d = 0.15$ | $t = 0.6890$<br>$d = 0.10$ | $t = 0.847$<br>$d = 0.05$ |
| Box-Cox approach      |        |                           |                           |                           |                           |                            |                            |                            |                           |
| 50, 50                | 0.2    | 0.503                     | 0.462                     | 0.347                     | 0.217                     | 0.733                      | 0.642                      | 0.503                      | 0.337                     |
|                       | 0.4    | 0.600                     | 0.544                     | 0.419                     | 0.273                     | 0.842                      | 0.755                      | 0.607                      | 0.397                     |
|                       | 0.6    | 0.758                     | 0.687                     | 0.532                     | 0.333                     | 0.953                      | 0.893                      | 0.756                      | 0.526                     |
| 100, 100              | 0.2    | 0.806                     | 0.739                     | 0.610                     | 0.430                     | 0.942                      | 0.905                      | 0.820                      | 0.637                     |
|                       | 0.4    | 0.892                     | 0.833                     | 0.688                     | 0.493                     | 0.986                      | 0.967                      | 0.894                      | 0.726                     |
|                       | 0.6    | 0.973                     | 0.949                     | 0.842                     | 0.621                     | 1.000                      | 0.994                      | 0.975                      | 0.855                     |
| 200, 200              | 0.2    | 0.977                     | 0.965                     | 0.885                     | 0.718                     | 0.996                      | 0.992                      | 0.969                      | 0.890                     |
|                       | 0.4    | 0.999                     | 0.991                     | 0.944                     | 0.801                     | 1.000                      | 1.000                      | 0.993                      | 0.949                     |
|                       | 0.6    | 1.000                     | 0.999                     | 0.990                     | 0.897                     | 1.000                      | 1.000                      | 1.000                      | 0.993                     |
| Kernel-based approach |        |                           |                           |                           |                           |                            |                            |                            |                           |
| 50, 50                | 0.2    | 0.4180                    | 0.3930                    | 0.3000                    | 0.1790                    | 0.6250                     | 0.5200                     | 0.3340                     | 0.1620                    |
|                       | 0.4    | 0.5190                    | 0.4620                    | 0.3690                    | 0.2270                    | 0.7200                     | 0.5810                     | 0.4000                     | 0.1930                    |
|                       | 0.6    | 0.6310                    | 0.5710                    | 0.4390                    | 0.2770                    | 0.8480                     | 0.7250                     | 0.5310                     | 0.2610                    |
| 100, 100              | 0.2    | 0.7240                    | 0.6850                    | 0.5620                    | 0.3690                    | 0.9010                     | 0.7960                     | 0.5910                     | 0.3050                    |
|                       | 0.4    | 0.8060                    | 0.7900                    | 0.6440                    | 0.4210                    | 0.9500                     | 0.8790                     | 0.6950                     | 0.3670                    |
|                       | 0.6    | 0.9270                    | 0.8970                    | 0.7720                    | 0.5140                    | 0.9910                     | 0.9570                     | 0.8320                     | 0.5160                    |
| 200, 200              | 0.2    | 0.9340                    | 0.9320                    | 0.8490                    | 0.6340                    | 0.9950                     | 0.9720                     | 0.8730                     | 0.5470                    |
|                       | 0.4    | 0.9790                    | 0.9770                    | 0.9170                    | 0.7300                    | 0.9990                     | 0.9910                     | 0.9260                     | 0.6400                    |
|                       | 0.6    | 0.9970                    | 0.9930                    | 0.9700                    | 0.8260                    | 1.0000                     | 1.0000                     | 0.9770                     | 0.7920                    |

Table 6: Exploration of  $Z^*$  test size. Simulation results of 1000 replications where data representing diseased and healthy individuals are generated by bivariate lognormal and bivariate gamma distributions (valid null hypothesis since  $ROC_1(t) = ROC_2(t)$ ). The data are generated such that  $AUC_1 = AUC_2 = 0.6, 0.7$ , and  $0.8$ . The kernel-based approach is used for estimation. Sample sizes explored are  $(100, 100)$ ,  $(200, 200)$  and  $(100, 200)$ . Correlation is set equal to  $\rho = 0.2, 0.4$ , and  $0.6$  for the data of both the healthy and diseased individuals.

|            |        | Size results (Kernel-based $Z^*$ statistic) |                  |           |           |           |                      |           |           |           |
|------------|--------|---------------------------------------------|------------------|-----------|-----------|-----------|----------------------|-----------|-----------|-----------|
| $n_A, n_B$ | $\rho$ | $AUC_1 = AUC_2$                             | Bivariate Gammas |           |           |           | Bivariate Lognormals |           |           |           |
|            |        |                                             | $t = 0.2$        | $t = 0.4$ | $t = 0.6$ | $t = 0.8$ | $t = 0.2$            | $t = 0.4$ | $t = 0.6$ | $t = 0.8$ |
| 100, 100   | 0.2    | 0.6                                         | 0.034            | 0.036     | 0.040     | 0.049     | 0.044                | 0.045     | 0.053     | 0.057     |
|            |        | 0.7                                         | 0.033            | 0.039     | 0.032     | 0.046     | 0.042                | 0.052     | 0.057     | 0.057     |
|            |        | 0.8                                         | 0.047            | 0.049     | 0.051     | 0.051     | 0.039                | 0.049     | 0.057     | 0.060     |
|            | 0.4    | 0.6                                         | 0.035            | 0.031     | 0.037     | 0.045     | 0.048                | 0.055     | 0.054     | 0.053     |
|            |        | 0.7                                         | 0.039            | 0.035     | 0.041     | 0.039     | 0.048                | 0.058     | 0.049     | 0.054     |
|            |        | 0.8                                         | 0.040            | 0.038     | 0.043     | 0.048     | 0.048                | 0.052     | 0.046     | 0.051     |
|            | 0.6    | 0.6                                         | 0.036            | 0.0440    | 0.0430    | 0.0310    | 0.0480               | 0.062     | 0.055     | 0.043     |
|            |        | 0.7                                         | 0.042            | 0.0450    | 0.0460    | 0.0570    | 0.0530               | 0.061     | 0.048     | 0.045     |
|            |        | 0.8                                         | 0.043            | 0.0440    | 0.0410    | 0.0440    | 0.0490               | 0.047     | 0.047     | 0.043     |
| 200, 200   | 0.2    | 0.6                                         | 0.054            | 0.052     | 0.050     | 0.042     | 0.051                | 0.055     | 0.055     | 0.063     |
|            |        | 0.7                                         | 0.049            | 0.046     | 0.045     | 0.051     | 0.051                | 0.056     | 0.057     | 0.071     |
|            |        | 0.8                                         | 0.044            | 0.045     | 0.043     | 0.050     | 0.053                | 0.050     | 0.072     | 0.067     |
|            | 0.4    | 0.6                                         | 0.046            | 0.045     | 0.046     | 0.044     | 0.048                | 0.052     | 0.058     | 0.060     |
|            |        | 0.7                                         | 0.043            | 0.037     | 0.039     | 0.040     | 0.050                | 0.054     | 0.058     | 0.070     |
|            |        | 0.8                                         | 0.035            | 0.053     | 0.038     | 0.043     | 0.046                | 0.054     | 0.070     | 0.068     |
|            | 0.6    | 0.6                                         | 0.045            | 0.044     | 0.041     | 0.047     | 0.045                | 0.053     | 0.068     | 0.059     |
|            |        | 0.7                                         | 0.043            | 0.042     | 0.043     | 0.051     | 0.045                | 0.051     | 0.064     | 0.067     |
|            |        | 0.8                                         | 0.033            | 0.039     | 0.048     | 0.060     | 0.046                | 0.054     | 0.068     | 0.065     |
| 100, 200   | 0.2    | 0.6                                         | 0.051            | 0.049     | 0.055     | 0.058     | 0.050                | 0.045     | 0.046     | 0.056     |
|            |        | 0.7                                         | 0.049            | 0.049     | 0.044     | 0.052     | 0.056                | 0.043     | 0.052     | 0.058     |
|            |        | 0.8                                         | 0.051            | 0.045     | 0.050     | 0.054     | 0.053                | 0.048     | 0.057     | 0.062     |
|            | 0.4    | 0.6                                         | 0.046            | 0.043     | 0.042     | 0.049     | 0.047                | 0.040     | 0.048     | 0.054     |
|            |        | 0.7                                         | 0.044            | 0.042     | 0.040     | 0.050     | 0.055                | 0.046     | 0.051     | 0.057     |
|            |        | 0.8                                         | 0.045            | 0.040     | 0.049     | 0.038     | 0.052                | 0.042     | 0.054     | 0.061     |
|            | 0.6    | 0.6                                         | 0.039            | 0.042     | 0.053     | 0.053     | 0.056                | 0.044     | 0.052     | 0.052     |
|            |        | 0.7                                         | 0.044            | 0.038     | 0.043     | 0.049     | 0.058                | 0.051     | 0.049     | 0.050     |
|            |        | 0.8                                         | 0.041            | 0.035     | 0.037     | 0.041     | 0.058                | 0.051     | 0.051     | 0.055     |



Table 7: Size simulation results with respect to the  $AUC$  of 1000 replications where data representing the diseased and healthy individuals are generated by bivariate lognormal and bivariate gamma distributions (valid null hypothesis  $ROC_1(t) = ROC_2(t)$ ). The data are generated such that  $AUC_1 = AUC_2 = 0.6, 0.7$ , and  $0.8$ . The Box-Cox, kernel-based and DeLong's methods are compared. Sample sizes explored are  $(100, 100)$ ,  $(200, 200)$  and  $(100, 200)$ . Correlation is set equal to  $\rho = 0.2, 0.4$ , and  $0.6$  for the data of both the healthy and diseased individuals.

| AUC size results |        |                  |                  |               |               |                      |               |               |
|------------------|--------|------------------|------------------|---------------|---------------|----------------------|---------------|---------------|
|                  |        | Bivariate Gammas |                  |               |               | Bivariate Lognormals |               |               |
| $n_A, n_B$       | $\rho$ | $AUC$            | <i>Box - Cox</i> | <i>Kernel</i> | <i>DeLong</i> | <i>Box - Cox</i>     | <i>Kernel</i> | <i>DeLong</i> |
| 100, 100         | 0.2    | 0.6              | 0.051            | 0.040         | 0.042         | 0.056                | 0.051         | 0.055         |
|                  |        | 0.7              | 0.049            | 0.048         | 0.043         | 0.057                | 0.053         | 0.052         |
|                  |        | 0.8              | 0.059            | 0.055         | 0.044         | 0.054                | 0.054         | 0.055         |
|                  | 0.4    | 0.6              | 0.040            | 0.037         | 0.044         | 0.058                | 0.059         | 0.058         |
|                  |        | 0.7              | 0.042            | 0.042         | 0.043         | 0.055                | 0.055         | 0.056         |
|                  |        | 0.8              | 0.041            | 0.043         | 0.043         | 0.055                | 0.055         | 0.051         |
|                  | 0.6    | 0.6              | 0.052            | 0.045         | 0.048         | 0.052                | 0.062         | 0.061         |
|                  |        | 0.7              | 0.047            | 0.045         | 0.044         | 0.057                | 0.059         | 0.058         |
|                  |        | 0.8              | 0.047            | 0.050         | 0.045         | 0.053                | 0.055         | 0.045         |
| 200, 200         | 0.2    | 0.6              | 0.057            | 0.059         | 0.054         | 0.058                | 0.063         | 0.059         |
|                  |        | 0.7              | 0.057            | 0.050         | 0.053         | 0.059                | 0.053         | 0.057         |
|                  |        | 0.8              | 0.046            | 0.041         | 0.044         | 0.063                | 0.056         | 0.049         |
|                  | 0.4    | 0.6              | 0.053            | 0.050         | 0.046         | 0.062                | 0.059         | 0.057         |
|                  |        | 0.7              | 0.040            | 0.038         | 0.038         | 0.060                | 0.049         | 0.050         |
|                  |        | 0.8              | 0.048            | 0.048         | 0.049         | 0.061                | 0.053         | 0.053         |
|                  | 0.6    | 0.6              | 0.047            | 0.045         | 0.040         | 0.065                | 0.056         | 0.062         |
|                  |        | 0.7              | 0.044            | 0.044         | 0.042         | 0.059                | 0.051         | 0.056         |
|                  |        | 0.8              | 0.041            | 0.036         | 0.038         | 0.057                | 0.056         | 0.050         |
| 100, 200         | 0.2    | 0.6              | 0.045            | 0.042         | 0.039         | 0.045                | 0.051         | 0.052         |
|                  |        | 0.7              | 0.049            | 0.047         | 0.045         | 0.051                | 0.049         | 0.044         |
|                  |        | 0.8              | 0.051            | 0.052         | 0.052         | 0.046                | 0.048         | 0.047         |
|                  | 0.4    | 0.6              | 0.044            | 0.042         | 0.043         | 0.047                | 0.044         | 0.047         |
|                  |        | 0.7              | 0.043            | 0.040         | 0.045         | 0.051                | 0.045         | 0.043         |
|                  |        | 0.8              | 0.043            | 0.047         | 0.054         | 0.049                | 0.051         | 0.046         |
|                  | 0.6    | 0.6              | 0.039            | 0.044         | 0.046         | 0.041                | 0.043         | 0.043         |
|                  |        | 0.7              | 0.031            | 0.030         | 0.031         | 0.043                | 0.044         | 0.045         |
|                  |        | 0.8              | 0.039            | 0.039         | 0.045         | 0.048                | 0.054         | 0.046         |

Table 8: Power simulation results with respect to the  $AUC$  of 1000 replications where data representing diseased and healthy individuals are generated by bivariate lognormal and bivariate gamma distributions (non-valid null hypothesis). The Box-Cox, kernel-based and DeLong's methods are compared. Sample sizes explored are  $(50, 50)$ ,  $(100, 100)$ , and  $(200, 200)$ . Correlation is set equal to  $\rho = 0.2, 0.4$ , and  $0.6$  for data of both the healthy and diseased individuals.

| AUC power results |        |                  |               |               |                      |               |               |
|-------------------|--------|------------------|---------------|---------------|----------------------|---------------|---------------|
|                   |        | Bivariate Gammas |               |               | Bivariate Lognormals |               |               |
| $n_A, n_B$        | $\rho$ | <i>Box - Cox</i> | <i>Kernel</i> | <i>DeLong</i> | <i>Box - Cox</i>     | <i>Kernel</i> | <i>DeLong</i> |
| 50, 50            | 0.2    | 0.511            | 0.469         | 0.480         | 0.762                | 0.663         | 0.721         |
|                   | 0.4    | 0.610            | 0.569         | 0.575         | 0.857                | 0.754         | 0.830         |
|                   | 0.6    | 0.768            | 0.737         | 0.736         | 0.949                | 0.894         | 0.952         |
| 100, 100          | 0.2    | 0.809            | 0.776         | 0.771         | 0.953                | 0.909         | 0.949         |
|                   | 0.4    | 0.896            | 0.882         | 0.875         | 0.988                | 0.964         | 0.987         |
|                   | 0.6    | 0.972            | 0.969         | 0.969         | 0.994                | 0.994         | 0.998         |
| 200, 200          | 0.2    | 0.979            | 0.968         | 0.972         | 0.999                | 0.998         | 0.999         |
|                   | 0.4    | 0.998            | 0.995         | 0.993         | 1.000                | 1.000         | 1.000         |
|                   | 0.6    | 1.000            | 1.000         | 1.000         | 1.000                | 1.000         | 1.000         |

## Web-Appendix B (technical details)

# 1 Appendix

## 1.1 Derivation of the partial derivatives for the delta method

$$\begin{aligned}
\frac{\partial ROC_1(t)}{\partial \mu_{1A}} &= -\frac{\sqrt{2}}{2\sqrt{\pi}\sigma_{1B}} \exp\left(-0.5 \left(\frac{\mu_{1A} - \mu_{1B} - \Phi^{-1}(t)\sigma_{1A}}{\sigma_{1B}}\right)^2\right) \\
\frac{\partial ROC_1(t)}{\partial \mu_{1B}} &= \frac{\sqrt{2}}{2\sqrt{\pi}\sigma_{1B}} \exp\left(-0.5 \left(\frac{\mu_{1A} - \mu_{1B} - \Phi^{-1}(t)\sigma_{1A}}{\sigma_{1B}}\right)^2\right) \\
\frac{\partial ROC_1(t)}{\partial \sigma_{1A}} &= \frac{\Phi^{-1}(t)}{\sqrt{2\pi}\sigma_{1B}} \exp\left(-0.5 \left(\frac{\mu_{1A} - \mu_{1B} - \Phi^{-1}(t)\sigma_{1A}}{\sigma_{1B}}\right)^2\right) \\
\frac{\partial ROC_1(t)}{\partial \sigma_{1B}} &= \frac{\sqrt{2}}{2\sqrt{\pi}} \exp\left(-0.5 \left(\frac{\mu_{1A} - \mu_{1B} - \Phi^{-1}(t)\sigma_{1A}}{\sigma_{1B}}\right)^2\right) \left(\frac{\mu_{1A} - \mu_{1B} - \sigma_{1A}\Phi^{-1}(t)}{\sigma_{1B}^2}\right)
\end{aligned}$$

and the expressions are similar for  $\frac{\partial ROC_2(t)}{\partial \mu_{2A}}$ ,  $\frac{\partial ROC_2(t)}{\partial \mu_{2B}}$ ,  $\frac{\partial ROC_2(t)}{\partial \sigma_{2A}}$  and  $\frac{\partial ROC_2(t)}{\partial \sigma_{2B}}$ .

$$\begin{aligned}
\frac{\partial \Phi^{-1}(R\hat{O}C_1(t))}{\partial \mu_{1A}} &= -\frac{1}{\sigma_{1B}} \\
\frac{\partial \Phi^{-1}(R\hat{O}C_1(t))}{\partial \mu_{1B}} &= \frac{1}{\sigma_{1B}} \\
\frac{\partial \Phi^{-1}(R\hat{O}C_1(t))}{\partial \sigma_{1A}} &= \frac{\Phi^{-1}(t)}{\sigma_{1B}} \\
\frac{\partial \Phi^{-1}(R\hat{O}C_1(t))}{\partial \sigma_{1B}} &= \frac{\mu_{1A} - \mu_{1B} - \Phi^{-1}(t)\sigma_{1A}}{\sigma_{1B}^2}.
\end{aligned}$$

(1)

Similarly for the expressions that correspond to  $\Phi^{-1}(R\hat{O}C_2(t))$ .

## 1.2 Derivation of the partial derivatives for the delta method in the presence of covariates

$$\begin{aligned}
\frac{\partial \Phi^{-1}(ROC_{1,Z}(t))}{\partial \beta_0^{(1A)}} &= -\frac{1}{\sigma_{1B}} \\
\frac{\partial \Phi^{-1}(ROC_{1,Z}(t))}{\partial \beta_j^{(1A)}} &= -\frac{z_j^{(1A)}}{\sigma_{1B}} \\
\frac{\partial \Phi^{-1}(ROC_{1,Z}(t))}{\partial \beta_0^{(1B)}} &= \frac{1}{\sigma_{1B}} \\
\frac{\partial \Phi^{-1}(ROC_{1,Z}(t))}{\partial \beta_j^{(1A)}} &= \frac{z_j^{(1B)}}{\sigma_{1B}} \\
\frac{\partial \Phi^{-1}(ROC_{1,Z}(t))}{\partial \sigma_{1A}} &= -\frac{\sigma_{1B}\Phi^{-1}(t)}{\sigma_{1A}^2} \\
\frac{\partial \Phi^{-1}(ROC_{1,Z}(t))}{\partial \sigma_{1B}} &= -\frac{(\beta_0^{(1B)} + \sum_{j=1}^p \beta_j^{(1B)} Z_{ji}^{(1B)}) - (\beta_0^{(1A)} + \sum_{j=1}^p \beta_j^{(1A)} Z_{ji}^{(1A)})}{\sigma_{1B}^2} + \frac{\Phi^{-1}(t)}{\sigma_{1A}^2}.
\end{aligned}$$

where  $j = 1, \dots, p$ . The expressions for  $ROC_2(t)$  are similar.

### 1.3 Partial derivatives for the delta method (AUC)

$$\begin{aligned}
\frac{\partial \Phi^{-1}(AUC_1)}{\partial \mu_{1A}} &= \frac{-1}{\sigma_{1B} \sqrt{1 + (\sigma_{1A}/\sigma_{1B})^2}} \\
\frac{\partial \Phi^{-1}(AUC_1)}{\partial \mu_{1B}} &= \frac{1}{\sigma_{1B} \sqrt{1 + (\sigma_{1A}/\sigma_{1B})^2}} \\
\frac{\partial \Phi^{-1}(AUC_1)}{\partial \sigma_{1A}} &= \frac{\sigma_{1A}(\mu_{1A} - \mu_{1B})}{\sigma_{1B}^3 (1 + (\sigma_{1A}/\sigma_{1B})^2)^{3/2}} \\
\frac{\partial \Phi^{-1}(AUC_1)}{\partial \sigma_{1B}} &= \frac{(\mu_{1A} - \mu_{1B})}{\sigma_{1B}^2 (1 + (\sigma_{1A}/\sigma_{1B})^2)^{3/2}}
\end{aligned}$$

### 1.4 Partial derivatives for the delta method in the presence of covariates (AUC)

$$\begin{aligned}
\frac{\partial \Phi^{-1}(AUC_{1,Z})}{\partial \beta_0^{(1A)}} &= \frac{-1}{\sigma_{1B} \sqrt{1 + \left(\frac{\sigma_{1A}}{\sigma_{1B}}\right)^2}} \\
\frac{\partial \Phi^{-1}(AUC_{1,Z})}{\partial \beta_j^{(1A)}} &= \frac{-z_j^{(1A)}}{\sigma_{1B} \sqrt{1 + \left(\frac{\sigma_{1A}}{\sigma_{1B}}\right)^2}} \\
\frac{\partial \Phi^{-1}(AUC_{1,Z})}{\partial \beta_0^{(1B)}} &= \frac{1}{\sigma_{1B} \sqrt{1 + \left(\frac{\sigma_{1A}}{\sigma_{1B}}\right)^2}} \\
\frac{\partial \Phi^{-1}(AUC_{1,Z})}{\partial \beta_j^{(1B)}} &= \frac{z_j^{(1B)}}{\sigma_{1B} \sqrt{1 + \left(\frac{\sigma_{1A}}{\sigma_{1B}}\right)^2}} \\
\frac{\partial \Phi^{-1}(AUC_{1,Z})}{\partial \sigma_{1A}} &= -\frac{\sigma_{1A}}{\sigma_{1B}^3 \left(\frac{\sigma_{1A}^2}{\sigma_{1B}^2} + 1\right)^{3/2}} \\
\frac{\partial \Phi^{-1}(AUC_{1,Z})}{\partial \sigma_{1B}} &= \frac{\sigma_{1A}^2}{\sigma_{1B}^4 \left(\frac{\sigma_{1A}^2}{\sigma_{1B}^2} + 1\right)^{3/2}} - \frac{1}{\sigma_{1B}^2 \left(\frac{\sigma_{1A}^2}{\sigma_{1B}^2} + 1\right)^{1/2}}
\end{aligned}$$

The expressions are similar for  $\Phi^{-1}(AUC_{2,Z})$ .

## 1.5 Derivation of the information matrix for the binormal-bivariate setting

Fisher's information matrix in this case is of the form:

$$I = - \begin{pmatrix} \frac{\partial^2 l(\mathbf{p})}{\partial \mu_{1A}^2} & 0 & 0 & 0 & \frac{\partial^2 l(\mathbf{p})}{\partial \mu_{1A} \partial \mu_{2A}} & 0 & 0 & 0 & 0 & 0 \\ 0 & \frac{\partial^2 l(\mathbf{p})}{\partial \sigma_{1A}^2} & 0 & 0 & 0 & \frac{\partial^2 l(\mathbf{p})}{\partial \sigma_{1A} \partial \sigma_{2A}} & 0 & 0 & \frac{\partial^2 l(\mathbf{p})}{\partial \sigma_{1A} \partial cov_A} & 0 \\ 0 & 0 & \frac{\partial^2 l(\mathbf{p})}{\partial \mu_{1B}^2} & 0 & 0 & 0 & \frac{\partial^2 l(\mathbf{p})}{\partial \mu_{1B} \partial \mu_{2B}} & 0 & 0 & 0 \\ 0 & 0 & 0 & \frac{\partial^2 l(\mathbf{p})}{\partial \sigma_{1B}^2} & 0 & 0 & 0 & \frac{\partial^2 l(\mathbf{p})}{\partial \sigma_{1B} \partial \sigma_{2B}} & 0 & \frac{\partial^2 l(\mathbf{p})}{\partial \sigma_{1B} \partial cov_B} \\ \frac{\partial^2 l(\mathbf{p})}{\partial \mu_{2A} \partial \mu_{1A}} & 0 & 0 & 0 & \frac{\partial^2 l(\mathbf{p})}{\partial \mu_{2A}^2} & 0 & 0 & 0 & 0 & 0 \\ 0 & \frac{\partial^2 l(\mathbf{p})}{\partial \sigma_{2A} \partial \sigma_{1A}} & 0 & 0 & 0 & \frac{\partial^2 l(\mathbf{p})}{\partial \sigma_{2A}^2} & 0 & 0 & \frac{\partial^2 l(\mathbf{p})}{\partial \sigma_{2A} \partial cov_A} & 0 \\ 0 & 0 & \frac{\partial^2 l(\mathbf{p})}{\partial \mu_{2B} \partial \mu_{1B}} & 0 & 0 & 0 & \frac{\partial^2 l(\mathbf{p})}{\partial \mu_{2B}^2} & 0 & 0 & 0 \\ 0 & 0 & 0 & \frac{\partial^2 l(\mathbf{p})}{\partial \sigma_{2B} \partial \sigma_{1B}} & 0 & 0 & 0 & \frac{\partial^2 l(\mathbf{p})}{\partial \sigma_{2B}^2} & 0 & \frac{\partial^2 l(\mathbf{p})}{\partial \sigma_{2B} \partial cov_B} \\ 0 & \frac{\partial^2 l(\mathbf{p})}{\partial cov_A \partial \sigma_{1A}} & 0 & 0 & 0 & \frac{\partial^2 l(\mathbf{p})}{\partial cov_A \partial \sigma_{2A}} & 0 & 0 & \frac{\partial^2 l(\mathbf{p})}{\partial cov_A^2} & 0 \\ 0 & 0 & 0 & \frac{\partial^2 l(\mathbf{p})}{\partial cov_B \partial \sigma_{1B}} & 0 & 0 & 0 & \frac{\partial^2 l(\mathbf{p})}{\partial cov_B \partial \sigma_{2B}} & 0 & \frac{\partial^2 l(\mathbf{p})}{\partial cov_B^2} \end{pmatrix}.$$

We present all the derivations required:

$$\begin{aligned} \frac{\partial^2 \log L}{\partial \mu_{1A}^2} &= \frac{n_A}{\sigma_{1A}^2 \left( \frac{cov_A^2}{\sigma_{1A}^2 \sigma_{2A}^2} - 1 \right)} \\ \frac{\partial^2 \log L}{\partial \sigma_{1A}^2} &= \frac{1}{(\sigma_{1A}^2 \sigma_{2A}^2 - cov_A^2)^3} \sum_{i=1}^{n_A} (A_{1i} - A_{2i} - A_{3i} - A_{4i} + A_{5i}) \end{aligned}$$

where

$$\begin{aligned} A_{1i} &= \sigma_{1A}^4 \sigma_{2A}^6 + cov_A^3 (2 \mu_{1A} \mu_{2A} \sigma_{2A}^2 + 2 W_{1Ai} W_{2Ai} \sigma_{2A}^2 - 2 W_{1Ai} \mu_{2A} \sigma_{2A}^2 - 2 W_{2Ai} \mu_{1A} \sigma_{2A}^2) \\ A_{2i} &= \sigma_{1A}^2 (3 W_{1Ai}^2 \sigma_{2A}^6 - 6 W_{1Ai} \mu_{1A} \sigma_{2A}^6 + 3 \mu_{1A}^2 \sigma_{2A}^6) \\ A_{3i} &= cov_A^2 (\sigma_{1A}^2 (3 W_{2Ai}^2 \sigma_{2A}^2 - 6 W_{2Ai} \mu_{2A} \sigma_{2A}^2 + 3 \mu_{2A}^2 \sigma_{2A}^2) + W_{1Ai}^2 \sigma_{2A}^4 + \mu_{1A}^2 \sigma_{2A}^4 - 2 W_{1Ai} \mu_{1A} \sigma_{2A}^4) \\ A_{4i} &= cov_A^4 (W_{2Ai}^2 - 2 W_{2Ai} \mu_{2A} + \mu_{2A}^2 + \sigma_{2A}^2) \\ A_{5i} &= cov_A \sigma_{1A}^2 (6 \mu_{1A} \mu_{2A} \sigma_{2A}^4 + 6 W_{1Ai} W_{2Ai} \sigma_{2A}^4 - 6 W_{1Ai} \mu_{2A} \sigma_{2A}^4 - 6 W_{2Ai} \mu_{1A} \sigma_{2A}^4) \end{aligned}$$

$$\frac{\partial^2 \log L}{\partial cov_A^2} = - \frac{1}{(\sigma_{1A}^2 \sigma_{2A}^2 - cov_A^2)^3} \sum_{i=1}^{n_A} (B_{1i} - B_{2i} + B_{3i} - B_{4i})$$

$$\begin{aligned} B_{1i} &= cov_A^2 ((3 W_{2Ai}^2 - 6 W_{2Ai} \mu_{2A} + 3 \mu_{2A}^2) \sigma_{1A}^2 + (3 W_{1Ai}^2 - 6 W_{1Ai} \mu_{1A} + 3 \mu_{1A}^2) \sigma_{2A}^2) \\ B_{2i} &= cov_A^3 (2 W_{1Ai} W_{2Ai} - 2 W_{1Ai} \mu_{2A} - 2 W_{2Ai} \mu_{1A} + 2 \mu_{1A} \mu_{2A}) \\ B_{3i} &= cov_A^4 + \sigma_{2A}^4 (\sigma_{1A}^2 (W_{1Ai}^2 - 2 W_{1Ai} \mu_{1A} + \mu_{1A}^2) - \sigma_{1A}^4) + \sigma_{1A}^4 \sigma_{2A}^2 (W_{2Ai}^2 - 2 W_{2Ai} \mu_{2A} + \mu_{2A}^2) \\ B_{4i} &= cov_A \sigma_{1A}^2 \sigma_{2A}^2 (6 W_{1Ai} W_{2Ai} - 6 W_{1Ai} \mu_{2A} - 6 W_{2Ai} \mu_{1A} + 6 \mu_{1A} \mu_{2A}) \end{aligned}$$

$$\begin{aligned} \frac{\partial^2 \log L}{\partial \mu_{1A} \partial \sigma_{1A}} &= \frac{2 \sigma_{1A} \sigma_{2A}^2 \sum_{i=1}^{n_A} (W_{2Ai} cov_A - cov_A \mu_{2A} - W_{1Ai} \sigma_{2A}^2 + \mu_{1A} \sigma_{2A}^2)}{(\sigma_{1A}^2 \sigma_{2A}^2 - cov_A^2)^2} = 0 \\ \frac{\partial^2 \log L}{\partial \mu_{1A} \partial \mu_{2A}} &= \frac{n_A cov_A}{\sigma_{1A}^2 \sigma_{2A}^2 - cov_A^2} \\ \frac{\partial^2 \log L}{\partial \mu_{1A} \partial \sigma_{2A}} &= - \frac{\sigma_{2A} \sum_{i=1}^{n_A} (2 cov_A^2 (W_{1Ai} - \mu_{1A}) - 2 cov_A \sigma_{1A}^2 (W_{2Ai} - \mu_{2A}))}{(\sigma_{1A}^2 \sigma_{2A}^2 - cov_A^2)^2} = 0 \\ \frac{\partial^2 \log L}{\partial \mu_{1A} \partial cov_A} &= - \sum_{i=1}^{n_A} \frac{cov_A^2 (W_{2Ai} - \mu_{2A}) - \sigma_{2A}^2 (cov_A (2 W_{1Ai} - 2 \mu_{1A}) - \sigma_{1A}^2 (W_{2Ai} - \mu_{2A}))}{(\sigma_{1A}^2 \sigma_{2A}^2 - cov_A^2)^2} = 0 \\ \frac{\partial^2 \log L}{\partial \sigma_{1A} \partial \mu_{2A}} &= - \frac{\sigma_{1A} \sum_{i=1}^{n_A} (2 cov_A^2 (W_{2Ai} - \mu_{2A}) - 2 cov_A \sigma_{2A}^2 (W_{1Ai} - \mu_{1A}))}{(\sigma_{1A}^2 \sigma_{2A}^2 - cov_A^2)^2} = 0 \end{aligned}$$

$$\begin{aligned} \frac{\partial^2 \log L}{\partial \sigma_{1A} \partial \sigma_{2A}} &= \sum_{i=1}^{n_A} (\sigma_{1A}^3 (2 \text{cov}_A (C_{1i}) + 2 \text{cov}_A^2) - \text{cov}_A^2 \sigma_{1A} (4 W_{1A}^2 - 8 W_{1A} \mu_{1A} + 4 \mu_{1A}^2)) \sigma_{2A}^3 \\ &+ \sum_{i=1}^{n_A} (\sigma_{1A} (2 \text{cov}_A^3 (C_{1i}) - 2 \text{cov}_A^4) - \text{cov}_A^2 \sigma_{1A}^3 (4 W_{2A}^2 - 8 W_{2A} \mu_{2A} + 4 \mu_{2A}^2)) \sigma_{2A} \end{aligned}$$

where

$$C_{1i} = 2 W_{1A} W_{2A} - 2 W_{1A} \mu_{2A} - 2 W_{2A} \mu_{1A} + 2 \mu_{1A} \mu_{2A}$$

$$\frac{\partial^2 \log L}{\partial \sigma_{1A} \partial \text{cov}_A} = \sum_{i=1}^{n_A} \frac{\sigma_{1A} (\text{cov}_A^3 D_{1i} + D_{2i} - \text{cov}_A^2 \sigma_{2A}^2 D_{3i}) - \sigma_{1A}^3 (\sigma_{2A}^4 D_{4i} + \text{cov}_A D_{5i})}{(\sigma_{1A}^2 \sigma_{2A}^2 - \text{cov}_A^2)^3}$$

$$\begin{aligned} D_{1i} &= 2 W_{2Ai}^2 - 4 W_{2Ai} \mu_{2A} + 2 \mu_{2A}^2 + 2 \sigma_{2A}^2 \\ D_{2i} &= \text{cov}_A \sigma_{2A}^4 (4 W_{1Ai}^2 - 8 W_{1Ai} \mu_{1A} + 4 \mu_{1A}^2) \\ D_{3i} &= 6 W_{1Ai} W_{2Ai} - 6 W_{1Ai} \mu_{2A} - 6 W_{2Ai} \mu_{1A} + 6 \mu_{1A} \mu_{2A} \\ D_{4i} &= 2 W_{1Ai} W_{2Ai} - 2 W_{1Ai} \mu_{2A} - 2 W_{2Ai} \mu_{1A} + 2 \mu_{1A} \mu_{2A} \\ D_{5i} &= 2 \sigma_{2A}^4 - \sigma_{2A}^2 (2 W_{2Ai}^2 - 4 W_{2Ai} \mu_{2A} + 2 \mu_{2A}^2) \end{aligned}$$

Note that all remaining nonzero derivatives are completely analogous to the above results and can be derived by substituting the parameters of the corresponding group. We also derive:

$$\frac{\partial^2 \log L}{\partial \mu_{1A} \partial \mu_{1B}} = 0, \frac{\partial^2 \log L}{\partial \mu_{1A} \partial \sigma_{1B}} = 0, \frac{\partial^2 \log L}{\partial \mu_{1A} \partial \mu_{2B}} = 0, \frac{\partial^2 \log L}{\partial \mu_{1A} \partial \sigma_{2B}} = 0, \frac{\partial^2 \log L}{\partial \mu_{1A} \partial \text{cov}_B} = 0$$

$$\frac{\partial^2 \log L}{\partial \sigma_{1A} \partial \mu_{1B}} = 0, \frac{\partial^2 \log L}{\partial \sigma_{1A} \partial \sigma_{1B}} = 0, \frac{\partial^2 \log L}{\partial \sigma_{1A} \partial \mu_{2B}} = 0, \frac{\partial^2 \log L}{\partial \sigma_{1A} \partial \sigma_{2B}} = 0, \frac{\partial^2 \log L}{\partial \sigma_{1A} \partial \text{cov}_B} = 0$$

$$\frac{\partial^2 \log L}{\partial \mu_{1B} \partial \mu_{2A}} = 0, \frac{\partial^2 \log L}{\partial \mu_{1B} \partial \sigma_{2A}} = 0, \frac{\partial^2 \log L}{\partial \mu_{1B} \partial \text{cov}_A} = 0,$$

$$\frac{\partial^2 \log L}{\partial \sigma_{1B} \partial \mu_{2A}} = 0, \frac{\partial^2 \log L}{\partial \sigma_{1B} \partial \sigma_{2A}} = 0, \frac{\partial^2 \log L}{\partial \sigma_{1B} \partial \text{cov}_A} = 0,$$

$$\frac{\partial^2 \log L}{\partial \mu_{2A} \partial \mu_{2B}} = 0, \frac{\partial^2 \log L}{\partial \mu_{2A} \partial \sigma_{2B}} = 0, \frac{\partial^2 \log L}{\partial \mu_{2A} \partial \text{cov}_B} = 0,$$

$$\frac{\partial^2 \log L}{\partial \sigma_{2A} \partial \mu_{2B}} = 0, \frac{\partial^2 \log L}{\partial \sigma_{2A} \partial \sigma_{2B}} = 0, \frac{\partial^2 \log L}{\partial \sigma_{2A} \partial \text{cov}_B} = 0,$$

$$\frac{\partial^2 \log L}{\partial \mu_{2B} \partial \text{cov}_A} = 0, \frac{\partial^2 \log L}{\partial \sigma_{2B} \partial \text{cov}_A} = 0, \frac{\partial^2 \log L}{\partial \text{cov}_A \partial \text{cov}_B} = 0.$$



The derivatives included in the upper left  $10 \times 10$  part of the above matrix are completely analogous to the ones derived in the previous subsection. Counting the matrix columns from left to right, note also that given the derivatives of the 11th column, the derivatives of the 12th column can be straightforwardly obtained by simple substitution of the corresponding parameters involved. Regarding the derivatives of the 11th column, we derive:

$$\begin{aligned}\frac{\partial^2 l(\mathbf{p})}{\partial \mu_{1A}^{(\lambda_1)} \partial \lambda_1} &= \sum_{i=1}^{n_A} \frac{\sigma_{2A}^{(\lambda_2)^2} (W_{1Ai}^{\lambda_1} \lambda_1 \log(W_{1Ai}) - W_{1Ai}^{\lambda_1} + 1)}{\lambda_1^2 \left( \sigma_{1A}^{(\lambda_1)^2} \sigma_{2A}^{(\lambda_2)^2} - \text{cov}_A^{(\lambda_1, 2)^2} \right)} \\ \frac{\partial^2 l(\mathbf{p})}{\partial \sigma_{1A}^{(\lambda_1)} \partial \lambda_1} &= \sum_{i=1}^{n_A} \frac{2 \sigma_{1A}^{(\lambda_1)} \sigma_{2A}^{(\lambda_2)^2} (K_{1i}) (K_{2i})}{\lambda_1^3 \lambda_2 \left( \sigma_{1A}^{(\lambda_1)^2} \sigma_{2A}^{(\lambda_2)^2} - \text{cov}_A^{(\lambda_1, 2)^2} \right)^2}\end{aligned}$$

where,

$$\begin{aligned}K_{1i} &= W_{1Ai}^{\lambda_1} \lambda_1 \log(W_{1Ai}) - W_{1Ai}^{\lambda_1} + 1 \\ K_{2i} &= \text{cov}_A^{(\lambda_1, 2)} \lambda_1 (1 - W_{2Ai}^{\lambda_2} \lambda_2) - \lambda_2 \sigma_{2A}^{(\lambda_2)^2} (1 + W_{1Ai}^{\lambda_1}) + (\lambda_1 \lambda_2) (\text{cov}_A^{(\lambda_1, 2)} \mu_{2A}^{(\lambda_2)} - \mu_{1A}^{(\lambda_1)} \sigma_{2A}^{(\lambda_2)^2})\end{aligned}$$

$$\begin{aligned}\frac{\partial^2 l(\mathbf{p})}{\partial \mu_{1B}^{(\lambda_1)} \partial \lambda_1} &= \sum_{i=1}^{n_B} \frac{\sigma_{2B}^{(\lambda_1)^2} (W_{1Bi}^{\lambda_1} \lambda_1 \log(W_{1Bi}) - W_{1Bi}^{\lambda_1} + 1)}{\lambda_1^2 \left( \sigma_{1B}^{(\lambda_1)^2} \sigma_{2B}^{(\lambda_1)^2} - \text{cov}_B^{(\lambda_1, 2)^2} \right)} \\ \frac{\partial^2 l(\mathbf{p})}{\partial \sigma_{1B}^{(\lambda_1)} \partial \lambda_1} &= \sum_{i=1}^{n_B} \frac{2 \sigma_{1B}^{(\lambda_1)} \sigma_{2B}^{(\lambda_1)^2} (K'_{1i}) (K'_{2i})}{\lambda_1^3 \lambda_2 \left( \sigma_{1B}^{(\lambda_1)^2} \sigma_{2B}^{(\lambda_1)^2} - \text{cov}_B^{(\lambda_1, 2)^2} \right)^2}\end{aligned}$$

where,

$$\begin{aligned}K'_{1i} &= W_{1Bi}^{\lambda_1} \lambda_1 \log(W_{1Bi}) - W_{1Bi}^{\lambda_1} + 1 \\ K'_{2i} &= \text{cov}_B^{(\lambda_1, 2)} \lambda_1 (1 - W_{2Bi}^{\lambda_2} \lambda_2) - \lambda_2 \sigma_{2B}^{(\lambda_1)^2} (1 + W_{1Bi}^{\lambda_1}) + (\lambda_1 \lambda_2) (\text{cov}_B^{(\lambda_1, 2)} \mu_{2B}^{(\lambda_2)} - \mu_{1B}^{(\lambda_1)} \sigma_{2B}^{(\lambda_1)^2})\end{aligned}$$

$$\begin{aligned}\frac{\partial^2 l(\mathbf{p})}{\partial \mu_{2A}^{(\lambda_2)} \partial \lambda_1} &= \sum_{i=1}^{n_A} - \frac{\text{cov}_A^{(\lambda_1, 2)} (W_{1Ai}^{\lambda_1} \lambda_1 \log(W_{1Ai}) - W_{1Ai}^{\lambda_1} + 1)}{\lambda_1^2 \left( \sigma_{1A}^{(\lambda_1)^2} \sigma_{2A}^{(\lambda_2)^2} - \text{cov}_A^{(\lambda_1, 2)^2} \right)} \\ \frac{\partial^2 l(\mathbf{p})}{\partial \sigma_{2A}^{(\lambda_2)} \partial \lambda_1} &= \sum_{i=1}^{n_A} - \frac{2 \text{cov}_A^{(\lambda_1, 2)} \sigma_{2A}^{(\lambda_2)} (K_{1i}) (L_{1i})}{\lambda_1^3 \lambda_2 \left( \sigma_{1A}^{(\lambda_1)^2} \sigma_{2A}^{(\lambda_2)^2} - \text{cov}_A^{(\lambda_1, 2)^2} \right)^2}\end{aligned}$$

where

$$L_{1i} = \text{cov}_A^{(\lambda_1, 2)} \lambda_2 (1 - W_{1Ai}^{\lambda_2}) - \lambda_1 \sigma_{1A}^{(\lambda_1)^2} (1 + W_{2Ai}^{\lambda_2})^{\lambda_2} + \lambda_1 \lambda_2 (\text{cov}_A^{(\lambda_1, 2)} \mu_{1A}^{(\lambda_1)} - \mu_{2A}^{(\lambda_2)} \sigma_{1A}^{(\lambda_1)^2})$$



$$\frac{\partial^2 l(\mathbf{p})}{\partial \mu_{2B}^{(\lambda_2)} \partial \lambda_1} = \sum_{i=1}^{n_B} \frac{\text{cov}_B^{(\lambda_{1,2})} (W_{1Bi}^{\lambda_1} \lambda_1 \log(W_{1Bi}) - W_{1Bi}^{\lambda_1} + 1)}{\lambda_1^2 \left( \sigma_{1B}^{(\lambda_1)^2} \sigma_{2B}^{(\lambda_1)^2} - \text{cov}_B^{(\lambda_{1,2})^2} \right)}$$

$$\frac{\partial^2 l(\mathbf{p})}{\partial \sigma_{2B}^{(\lambda_2)} \partial \lambda_1} = \sum_{i=1}^{n_B} \frac{2 \text{cov}_B^{(\lambda_{1,2})} \sigma_{2B}^{(\lambda_1)} (K'_{1i}) (L'_{1i})}{\lambda_1^3 \lambda_2 \left( \sigma_{1B}^{(\lambda_1)^2} \sigma_{2B}^{(\lambda_1)^2} - \text{cov}_B^{(\lambda_{1,2})^2} \right)^2}$$

where

$$L'_{1i} = \text{cov}_B^{(\lambda_{1,2})} \lambda_2 (1 - W_{1Bi}^2) - \lambda_1 \sigma_{1B}^{(\lambda_1)^2} (1 + W_{2Bi})^{\lambda_2} + \lambda_1 \lambda_2 (\text{cov}_B^{(\lambda_{1,2})} \mu_{1B}^{(\lambda_1)} - \mu_{2B}^{(\lambda_2)} \sigma_{1B}^{(\lambda_1)^2})$$

$$\frac{\partial^2 l(\mathbf{p})}{\partial \text{cov}_A^{(\lambda_{1,2})} \partial \lambda_1} = \sum_{i=1}^{n_A} \frac{(K_{1i}) (M_{1i} + M_{2i})}{\lambda_1^3 \lambda_2 \left( \sigma_{1A}^{(\lambda_1)^2} \sigma_{2A}^{(\lambda_2)^2} - \text{cov}_A^{(\lambda_{1,2})^2} \right)^2}$$

where

$$M_{1i} = \text{cov}_A^{(\lambda_{1,2})^2} (1 - W_{2Ai}^{\lambda_2}) - 2 \text{cov}_A^{(\lambda_{1,2})} \lambda_2 \sigma_{2A}^{(\lambda_2)^2} (1 - W_{1Ai}^{\lambda_1}) + \lambda_1 \sigma_{1A}^{(\lambda_1)^2} \sigma_{2A}^{(\lambda_2)^2} + 2W_{1Ai}^{\lambda_1}$$

$$M_{2i} = \lambda_1 \lambda_2 \mu_{2A}^{(\lambda_2)} (\text{cov}_A^{(\lambda_{1,2})^2} + \sigma_{1A}^{(\lambda_1)^2} \sigma_{2A}^{(\lambda_2)^2}) - \lambda_1 \sigma_{2A}^{(\lambda_2)^2} (W_{2Ai}^{\lambda_2} \sigma_{1A}^{(\lambda_1)^2} + 2 \text{cov}_A^{(\lambda_{1,2})} \lambda_2 \mu_{1A}^{(\lambda_1)})$$

$$\frac{\partial^2 l(\mathbf{p})}{\partial \text{cov}_B^{(\lambda_{1,2})} \partial \lambda_1} = \sum_{i=1}^{n_B} \frac{(K_{1i}) (M_{1i} + M_{2i})}{\lambda_1^3 \lambda_2 \left( \sigma_{1B}^{(\lambda_1)^2} \sigma_{2B}^{(\lambda_1)^2} - \text{cov}_B^{(\lambda_{1,2})^2} \right)^2}$$

where

$$M'_{1i} = \text{cov}_B^{(\lambda_{1,2})^2} (1 - W_{2Bi}^{\lambda_2}) - 2 \text{cov}_B^{(\lambda_{1,2})} \lambda_2 \sigma_{2B}^{(\lambda_1)^2} (1 - W_{1Bi}^{\lambda_1}) + \lambda_1 \sigma_{1B}^{(\lambda_1)^2} \sigma_{2B}^{(\lambda_1)^2} + 2W_{1Bi}^{\lambda_1}$$

$$M'_{2i} = \lambda_1 \lambda_2 \mu_{2B}^{(\lambda_2)} (\text{cov}_B^{(\lambda_{1,2})^2} + \sigma_{1B}^{(\lambda_1)^2} \sigma_{2B}^{(\lambda_1)^2}) - \lambda_1 \sigma_{2B}^{(\lambda_1)^2} (W_{2Bi}^{\lambda_2} \sigma_{1B}^{(\lambda_1)^2} + 2 \text{cov}_B^{(\lambda_{1,2})} \lambda_2 \mu_{1B}^{(\lambda_1)})$$

$$\frac{\partial^2 l(\mathbf{p})}{\partial \lambda_1^2} = \sum_{i=1}^{n_A} \frac{\frac{2N_{1i}^2 - N_{2i}}{\sigma_{1A}^{(\lambda_1)^2}} + \frac{N_{3i}}{\sigma_{1A}^{(\lambda_1)^2} \sigma_{2A}^{(\lambda_2)^2}}}{\frac{2 \text{cov}_A^{(\lambda_{1,2})^2}}{\sigma_{1A}^{(\lambda_1)^2} \sigma_{2A}^{(\lambda_2)^2}} - 2} + \sum_{i=1}^{n_B} \frac{\frac{2N'_{1i}{}^2 - N'_{2i}}{\sigma_{1B}^{(\lambda_1)^2}} + \frac{N'_{3i}}{\sigma_{1B}^{(\lambda_1)^2} \sigma_{2B}^{(\lambda_1)^2}}}{\frac{2 \text{cov}_B^{(\lambda_{1,2})^2}}{\sigma_{1B}^{(\lambda_1)^2} \sigma_{2B}^{(\lambda_1)^2}} - 2}$$

where,

$$\begin{aligned}
N_{1i} &= \frac{W_{1Ai}^{\lambda_1} - 1}{\lambda_1^2} - \frac{W_{1Ai}^{\lambda_1} \log(W_{1Ai})}{\lambda_1} \\
N_{2i} &= \left( 2\mu_{1A}^{(\lambda_1)} - \frac{2(W_{1Ai}^{\lambda_1} - 1)}{\lambda_1} \right) \left( \frac{2W_{1Ai}^{\lambda_1} - 2}{\lambda_1^3} - \frac{2W_{1Ai}^{\lambda_1} \log(W_{1Ai})}{\lambda_1^2} + \frac{W_{1Ai}^{\lambda_1} \log(W_{1Ai})^2}{\lambda_1} \right) \\
N_{3i} &= 2\text{cov}_A^{(\lambda_1, 2)} \left( \mu_{2A}^{(\lambda_2)} - \frac{W_{2Ai}^{\lambda_2} - 1}{\lambda_2} \right) \left( \frac{2W_{1Ai}^{\lambda_1} - 2}{\lambda_1^3} - \frac{2W_{1Ai}^{\lambda_1} \log(W_{1Ai})}{\lambda_1^2} + \frac{W_{1Ai}^{\lambda_1} \log(W_{1Ai})^2}{\lambda_1} \right) \\
N'_{1i} &= \frac{W_{1Bi}^{\lambda_1} - 1}{\lambda_1^2} - \frac{W_{1Bi}^{\lambda_1} \log(W_{1Bi})}{\lambda_1} \\
N'_{2i} &= \left( 2\mu_{1B}^{(\lambda_1)} - \frac{2(W_{1Bi}^{\lambda_1} - 1)}{\lambda_1} \right) \left( \frac{2W_{1Bi}^{\lambda_1} - 2}{\lambda_1^3} - \frac{2W_{1Bi}^{\lambda_1} \log(W_{1Bi})}{\lambda_1^2} + \frac{W_{1Bi}^{\lambda_1} \log(W_{1Bi})^2}{\lambda_1} \right) \\
N'_{3i} &= 2\text{cov}_B^{(\lambda_1, 2)} \left( \mu_{2B}^{(\lambda_2)} - \frac{W_{2Bi}^{\lambda_2} - 1}{\lambda_2} \right) \left( \frac{2W_{1Bi}^{\lambda_1} - 2}{\lambda_1^3} - \frac{2W_{1Bi}^{\lambda_1} \log(W_{1Bi})}{\lambda_1^2} + \frac{W_{1Bi}^{\lambda_1} \log(W_{1Bi})^2}{\lambda_1} \right)
\end{aligned}$$

$$\begin{aligned}
\frac{\partial^2 l(\mathbf{p})}{\partial \lambda_1 \partial \lambda_2} &= \sum_{i=1}^{n_A} \frac{2\text{cov}_A^{(\lambda_1, 2)} \left( W_{1Ai}^{\lambda_1} \lambda_1 \log(W_{1Ai}) - W_{1Ai}^{\lambda_1} + 1 \right) \left( W_{2Ai}^{\lambda_2} \lambda_2 \log(W_{2Ai}) - W_{2Ai}^{\lambda_2} + 1 \right)}{\lambda_1^2 \lambda_2^2 \left( 2\sigma_{1A}^{(\lambda_1)^2} \sigma_{2A}^{(\lambda_2)^2} - 2\text{cov}_A^{(\lambda_1, 2)^2} \right)} \\
&+ \sum_{i=1}^{n_B} \frac{2\text{cov}_B^{(\lambda_1, 2)} \left( W_{1Bi}^{\lambda_1} \lambda_1 \log(W_{1Bi}) - W_{1Bi}^{\lambda_1} + 1 \right) \left( W_{2Bi}^{\lambda_2} \lambda_2 \log(W_{2Bi}) - W_{2Bi}^{\lambda_2} + 1 \right)}{\lambda_1^2 \lambda_2^2 \left( 2\sigma_{1B}^{(\lambda_1)^2} \sigma_{2B}^{(\lambda_1)^2} - 2\text{cov}_B^{(\lambda_1, 2)^2} \right)}.
\end{aligned}$$

Derivatives included in the last column of Fisher's information matrix:  $\frac{\partial^2 l(\mathbf{p})}{\partial \mu_{1A}^{(\lambda_1)} \partial \lambda_2}$ ,  $\frac{\partial^2 l(\mathbf{p})}{\partial \sigma_{1A}^{(\lambda_1)} \partial \lambda_2}$ ,  $\frac{\partial^2 l(\mathbf{p})}{\partial \mu_{1B}^{(\lambda_1)} \partial \lambda_2}$ ,  $\frac{\partial^2 l(\mathbf{p})}{\partial \sigma_{1B}^{(\lambda_1)} \partial \lambda_2}$ ,  $\frac{\partial^2 l(\mathbf{p})}{\partial \mu_{2A}^{(\lambda_1)} \partial \lambda_2}$ ,  $\frac{\partial^2 l(\mathbf{p})}{\partial \sigma_{2A}^{(\lambda_1)} \partial \lambda_2}$ ,  $\frac{\partial^2 l(\mathbf{p})}{\partial \text{cov}_A^{(\lambda_1, 2)} \partial \lambda_2}$ ,  $\frac{\partial^2 l(\mathbf{p})}{\partial \text{cov}_B^{(\lambda_1, 2)} \partial \lambda_2}$ , are respectively completely analogous to  $\frac{\partial^2 l(\mathbf{p})}{\partial \mu_{1A}^{(\lambda_1)} \partial \lambda_1}$ ,  $\frac{\partial^2 l(\mathbf{p})}{\partial \sigma_{1A}^{(\lambda_1)} \partial \lambda_1}$ ,  $\frac{\partial^2 l(\mathbf{p})}{\partial \mu_{1B}^{(\lambda_1)} \partial \lambda_1}$ ,  $\frac{\partial^2 l(\mathbf{p})}{\partial \sigma_{1B}^{(\lambda_1)} \partial \lambda_1}$ ,  $\frac{\partial^2 l(\mathbf{p})}{\partial \mu_{2A}^{(\lambda_1)} \partial \lambda_1}$ ,  $\frac{\partial^2 l(\mathbf{p})}{\partial \sigma_{2A}^{(\lambda_1)} \partial \lambda_1}$ ,  $\frac{\partial^2 l(\mathbf{p})}{\partial \mu_{2B}^{(\lambda_1)} \partial \lambda_1}$ ,  $\frac{\partial^2 l(\mathbf{p})}{\partial \sigma_{2B}^{(\lambda_1)} \partial \lambda_1}$ ,  $\frac{\partial^2 l(\mathbf{p})}{\partial \text{cov}_A^{(\lambda_1, 2)} \partial \lambda_1}$ ,  $\frac{\partial^2 l(\mathbf{p})}{\partial \text{cov}_B^{(\lambda_1, 2)} \partial \lambda_1}$  and can be obtained by simple substitution of  $W_{1A}$ ,  $W_{1B}$ ,  $\lambda_1$ ,  $\mu_{1A}$  and  $\mu_{1B}$  with  $W_{2A}$ ,  $W_{2B}$ ,  $\lambda_2$ ,  $\mu_{2A}$ ,  $\mu_{2B}$ , respectively.

## 1.7 Normality with covariates

Here, we restate and derive all derivatives of matrix  $M_A$ . All derivatives contained in matrix  $M_B$  are completely analogous to the ones that follow.

$$M_A = \begin{pmatrix} \frac{\partial^2 l(\mathbf{p}_Z)}{\partial \beta_0^{(1A)^2}} & \cdots & \frac{\partial^2 l(\mathbf{p}_Z)}{\partial \beta_0^{(1A)} \partial \beta_j^{(1A)}} & \cdots & \frac{\partial^2 l(\mathbf{p}_Z)}{\partial \beta_0^{(1A)} \partial \beta_p^{(2A)}} & \frac{\partial^2 l(\mathbf{p}_Z)}{\partial \beta_0^{(1A)} \partial \sigma_{1A}} & \frac{\partial^2 l(\mathbf{p}_Z)}{\partial \beta_0^{(1A)} \partial \sigma_{2A}} & \frac{\partial^2 l(\mathbf{p}_Z)}{\partial \beta_0^{(1A)} \partial cov_A} \\ \vdots & \cdots & \vdots & \cdots & \vdots & \vdots & \vdots & \vdots \\ \vdots & \cdots & \frac{\partial^2 l(\mathbf{p}_Z)}{\partial \beta_j^{(1A)^2}} & \cdots & \cdots & \frac{\partial^2 l(\mathbf{p}_Z)}{\partial \beta_j^{(1A)} \partial \sigma_{1A}} & \frac{\partial^2 l(\mathbf{p}_Z)}{\partial \beta_j^{(1A)} \partial \sigma_{2A}} & \frac{\partial^2 l(\mathbf{p}_Z)}{\partial \beta_j^{(1A)} \partial cov_A} \\ \vdots & \cdots & \frac{\partial^2 l(\mathbf{p}_Z)}{\partial \beta_j^{(1A)} \partial \beta_{j'}^{(1A)}} & \cdots & \cdots & \cdots & \cdots & \cdots \\ \frac{\partial^2 l(\mathbf{p}_Z)}{\partial \beta_p^{(2A)} \partial \beta_0^{(1A)}} & \cdots & \cdots & \cdots & \frac{\partial^2 l(\mathbf{p}_Z)}{\partial \beta_p^{(2A)^2}} & \frac{\partial^2 l(\mathbf{p}_Z)}{\partial \beta_p^{(2A)} \partial \sigma_{1A}} & \frac{\partial^2 l(\mathbf{p}_Z)}{\partial \beta_p^{(2A)} \partial \sigma_{2A}} & \frac{\partial^2 l(\mathbf{p}_Z)}{\partial \beta_p^{(2A)} \partial cov_A} \\ \frac{\partial^2 l(\mathbf{p}_Z)}{\partial \sigma_{1A} \partial \beta_0^{(1A)}} & \cdots & \cdots & \cdots & \frac{\partial^2 l(\mathbf{p}_Z)}{\partial \sigma_{1A} \partial \beta_p^{(2A)}} & \frac{\partial^2 l(\mathbf{p}_Z)}{\partial \sigma_{1A}^2} & \frac{\partial^2 l(\mathbf{p}_Z)}{\partial \sigma_{1A} \partial \sigma_{2A}} & \frac{\partial^2 l(\mathbf{p}_Z)}{\partial \sigma_{1A} \partial cov_A} \\ \frac{\partial^2 l(\mathbf{p}_Z)}{\partial \sigma_{2A} \partial \beta_0^{(1A)}} & \cdots & \cdots & \cdots & \frac{\partial^2 l(\mathbf{p}_Z)}{\partial \sigma_{2A} \partial \beta_p^{(2A)}} & \frac{\partial^2 l(\mathbf{p}_Z)}{\partial \sigma_{2A} \partial \sigma_{1A}} & \frac{\partial^2 l(\mathbf{p}_Z)}{\partial \sigma_{2A}^2} & \frac{\partial^2 l(\mathbf{p}_Z)}{\partial \sigma_{2A} \partial cov_A} \\ \frac{\partial^2 l(\mathbf{p}_Z)}{\partial cov_A \partial \beta_0^{(1A)}} & \cdots & \cdots & \cdots & \frac{\partial^2 l(\mathbf{p}_Z)}{\partial cov_A \partial \beta_p^{(2A)}} & \frac{\partial^2 l(\mathbf{p}_Z)}{\partial cov_A \partial \sigma_{1A}} & \frac{\partial^2 l(\mathbf{p}_Z)}{\partial cov_A \partial \sigma_{2A}} & \frac{\partial^2 l(\mathbf{p}_Z)}{\partial cov_A^2} \end{pmatrix} \quad ((p+4) \times (p+4)).$$

$$\begin{aligned} \frac{\partial^2 l(\mathbf{p}_Z)}{\partial \beta_0^{(1A)^2}} &= -\frac{n_A}{\sigma_{1A}^2 - \frac{cov_A^2}{\sigma_{2A}^2}} \\ \frac{\partial^2 l(\mathbf{p}_Z)}{\partial \beta_0^{(1A)} \beta_j^{(1A)}} &= -\sum_{i=1}^{n_A} \frac{Z_{ji}^{(1A)}}{\sigma_{1A}^2 - \frac{cov_A^2}{\sigma_{2A}^2}} \\ \frac{\partial^2 l(\mathbf{p}_Z)}{\partial \beta_0^{(1A)} \beta_j^{(2A)}} &= \sum_{i=1}^{n_A} \frac{Z_{ji}^{(2A)} cov_A}{\sigma_{1A}^2 \sigma_{2A}^2 - cov_A^2} \\ \frac{\partial^2 l(\mathbf{p}_Z)}{\partial \beta_0^{(1A)} \sigma_{1A}} &= 0 \\ \frac{\partial^2 l(\mathbf{p}_Z)}{\partial \beta_0^{(1A)} \sigma_{2A}} &= 0 \\ \frac{\partial^2 l(\mathbf{p}_Z)}{\partial \beta_0^{(1A)} cov_A} &= 0 \\ \frac{\partial^2 l(\mathbf{p}_Z)}{\partial \beta_j^{(1A)^2}} &= -\sum_{i=1}^{n_A} \frac{Z_{ji}^{(1A)}}{\sigma_{1A}^2 - \frac{cov_A^2}{\sigma_{2A}^2}} \\ \frac{\partial^2 l(\mathbf{p}_Z)}{\partial \beta_j^{(2A)^2}} &= -\sum_{i=1}^{n_A} \frac{Z_{ji}^{(2A)}}{\sigma_{2A}^2 - \frac{cov_A^2}{\sigma_{1A}^2}} \\ \frac{\partial^2 l(\mathbf{p}_Z)}{\partial \beta_j^{(1A)} \beta_{j'}^{(1A)}} &= -\sum_{i=1}^{n_A} \frac{Z_j^{(1A)} Z_{j'}^{(1A)}}{\sigma_{1A}^2 - \frac{cov_A^2}{\sigma_{2A}^2}}, j \neq j' \\ \frac{\partial^2 l(\mathbf{p}_Z)}{\partial \beta_j^{(2A)} \beta_{j'}^{(2A)}} &= -\sum_{i=1}^{n_A} \frac{Z_j^{(2A)} Z_{j'}^{(2A)}}{\sigma_{2A}^2 - \frac{cov_A^2}{\sigma_{1A}^2}}, j \neq j' \end{aligned}$$

$$\begin{aligned}
\frac{\partial^2 l(\mathbf{p}_Z)}{\partial \beta_k^{(1A)} \sigma_{1A}} &= \sigma_{1A} \sum_{i=1}^{n_A} \frac{2Z_{ki}^{(1A)} \text{cov}_A \sigma_{2A}^2 (W_{2Ai} - \beta_0^{(2A)} - \sum_{j=1}^p \beta_j^{(2A)} Z_{ji}^{(2A)})}{(\sigma_{1A}^2 \sigma_{2A}^2 - \text{cov}_A^2)^2} \\
&- \sigma_{1A} \sum_{i=1}^{n_A} \frac{2Z_{ki}^{(1A)} \sigma_{2A}^4 (W_{1Ai} - \beta_0^{(1A)} - \sum_{j=1}^p \beta_j^{(1A)} Z_{ji}^{(1A)})}{(\sigma_{1A}^2 \sigma_{2A}^2 - \text{cov}_A^2)^2} \\
\frac{\partial^2 l(\mathbf{p}_Z)}{\partial \beta_k^{(2A)} \sigma_{2A}} &= \sigma_{2A} \sum_{i=1}^{n_A} \frac{2Z_{ki}^{(2A)} \text{cov}_A \sigma_{1A}^2 (W_{1Ai} - \beta_0^{(1A)} - \sum_{j=1}^p \beta_j^{(1A)} Z_{ji}^{(1A)})}{(\sigma_{1A}^2 \sigma_{2A}^2 - \text{cov}_A^2)^2} \\
&- \sigma_{2A} \sum_{i=1}^{n_A} \frac{2Z_{ki}^{(2A)} \sigma_{1A}^4 (W_{2Ai} - \beta_0^{(2A)} - \sum_{j=1}^p \beta_j^{(2A)} Z_{ji}^{(2A)})}{(\sigma_{1A}^2 \sigma_{2A}^2 - \text{cov}_A^2)^2} \\
\frac{\partial^2 l(\mathbf{p}_Z)}{\partial \beta_k^{(1A)} \sigma_{2A}} &= \sigma_{2A} \sum_{i=1}^{n_A} \frac{2Z_{ki}^{(1A)} \text{cov}_A \sigma_{1A}^2 (W_{2Ai} - \beta_0^{(2A)} - \sum_{j=1}^p \beta_j^{(2A)} Z_{ji}^{(2A)})}{(\sigma_{1A}^2 \sigma_{2A}^2 - \text{cov}_A^2)^2} \\
&- \sigma_{2A} \sum_{i=1}^{n_A} \frac{2Z_{ki}^{(1A)} \text{cov}_A^2 (W_{1Ai} - \beta_0^{(1A)} - \sum_{j=1}^p \beta_j^{(1A)} Z_{ji}^{(1A)})}{(\sigma_{1A}^2 \sigma_{2A}^2 - \text{cov}_A^2)^2} \\
\frac{\partial^2 l(\mathbf{p}_Z)}{\partial \beta_k^{(2A)} \sigma_{1A}} &= \sigma_{1A} \sum_{i=1}^{n_A} \frac{2Z_{ki}^{(2A)} \text{cov}_A \sigma_{2A}^2 (W_{1Ai} - \beta_0^{(1A)} - \sum_{j=1}^p \beta_j^{(1A)} Z_{ji}^{(1A)})}{(\sigma_{1A}^2 \sigma_{2A}^2 - \text{cov}_A^2)^2} \\
&- \sigma_{1A} \sum_{i=1}^{n_A} \frac{2Z_{ki}^{(2A)} \text{cov}_A^2 (W_{2Ai} - \beta_0^{(2A)} - \sum_{j=1}^p \beta_j^{(2A)} Z_{ji}^{(2A)})}{(\sigma_{1A}^2 \sigma_{2A}^2 - \text{cov}_A^2)^2} \\
\frac{\partial^2 l(\mathbf{p}_Z)}{\partial \beta_k^{(1A)} \text{cov}_A} &= - \sum_{i=1}^{n_A} \sigma_{2A}^2 \frac{2Z_{ki}^{(1A)} \text{cov}_A (\beta_0^{(1A)} + \sum_{j=1}^p \beta_j^{(1A)} Z_{ji}^{(1A)} - W_{1Ai})}{(\sigma_{1A}^2 \sigma_{2A}^2 - \text{cov}_A^2)^2} \\
&- \sum_{i=1}^{n_A} \frac{Z_{ki}^{(1A)} \sigma_{1A}^2 \sigma_{2A}^2 (\beta_0^{(2A)} + \sum_{j=1}^p \beta_j^{(2A)} Z_{ji}^{(2A)} - W_{2Ai})}{(\sigma_{1A}^2 \sigma_{2A}^2 - \text{cov}_A^2)^2} \\
&- \sum_{i=1}^{n_A} \frac{Z_{ki}^{(1A)} \text{cov}_A^2 (\beta_0^{(2A)} + \sum_{j=1}^p \beta_j^{(2A)} Z_{ji}^{(2A)} - W_{2Ai})}{(\sigma_{1A}^2 \sigma_{2A}^2 - \text{cov}_A^2)^2} \\
\frac{\partial^2 l(\mathbf{p}_Z)}{\partial \beta_k^{(2A)} \text{cov}_A} &= - \sum_{i=1}^{n_A} \sigma_{1A}^2 \frac{2Z_{ki}^{(2A)} \text{cov}_A (\beta_0^{(2A)} + \sum_{j=1}^p \beta_j^{(2A)} Z_{ji}^{(2A)} - W_{2Ai})}{(\sigma_{2A}^2 \sigma_{1A}^2 - \text{cov}_A^2)^2} \\
&- \sum_{i=1}^{n_A} \frac{Z_{ki}^{(2A)} \sigma_{2A}^2 \sigma_{1A}^2 (\beta_0^{(1A)} + \sum_{j=1}^p \beta_j^{(1A)} Z_{ji}^{(1A)} - W_{1Ai})}{(\sigma_{1A}^2 \sigma_{2A}^2 - \text{cov}_A^2)^2} \\
&- \sum_{i=1}^{n_A} \frac{Z_{ki}^{(2A)} \text{cov}_A^2 (\beta_0^{(1A)} + \sum_{j=1}^p \beta_j^{(1A)} Z_{ji}^{(1A)} - W_{1Ai})}{(\sigma_{1A}^2 \sigma_{2A}^2 - \text{cov}_A^2)^2}
\end{aligned}$$

and the remaining derivatives  $\frac{\partial^2 l(\mathbf{p}_Z)}{\partial \sigma_{1A}^2}$ ,  $\frac{\partial^2 l(\mathbf{p}_Z)}{\partial \sigma_{2A}^2}$ ,  $\frac{\partial^2 l(\mathbf{p}_Z)}{\partial \sigma_{1A} \partial \sigma_{2A}}$ ,  $\frac{\partial^2 l(\mathbf{p}_Z)}{\partial \sigma_{1A} \partial \text{cov}_A}$ ,  $\frac{\partial^2 l(\mathbf{p}_Z)}{\partial \sigma_{2A} \partial \text{cov}_A}$  and  $\frac{\partial^2 l(\mathbf{p}_Z)}{\partial \text{cov}_A^2}$  are analogous to their counterparts presented in section (1.5).

## 1.8 Partial derivatives for the construction of the $Z$ test in the setting where covariates are present

$$\begin{aligned}
\frac{\partial ROC_{1,Z}(t)}{\partial \beta_0^{(1A)}} &= -\frac{\sqrt{2}}{2\sqrt{\pi}\sigma_{1B}} \exp\left(-\frac{1}{2}\left(\frac{\beta_0^{(1A)} + \sum_{j=1}^p \beta_j^{(1A)} Z_j^{(1A)} - (\beta_0^{(1B)} + \sum_{j=1}^p \beta_j^{(1B)} Z_j^{(1B)})}{\sigma_{1B}} - \frac{\sigma_{1B}\Phi^{-1}(t)}{\sigma_{1A}}\right)^2\right) \\
\frac{\partial ROC_{1,Z}(t)}{\partial \beta_j^{(1A)}} &= -\frac{z_j^{(1A)}\sqrt{2}}{2\sqrt{\pi}\sigma_{1B}} \exp\left(-\frac{1}{2}\left(\frac{\beta_0^{(1A)} + \sum_{j=1}^p \beta_j^{(1A)} Z_j^{(1A)} - (\beta_0^{(1B)} + \sum_{j=1}^p \beta_j^{(1B)} Z_j^{(1B)})}{\sigma_{1B}} - \frac{\sigma_{1B}\Phi^{-1}(t)}{\sigma_{1A}}\right)^2\right) \\
\frac{\partial ROC_{1,Z}(t)}{\partial \beta_0^{(1B)}} &= \frac{\sqrt{2}}{2\sqrt{\pi}\sigma_{1B}} \exp\left(-\frac{1}{2}\left(\frac{\beta_0^{(1A)} + \sum_{j=1}^p \beta_j^{(1A)} Z_j^{(1A)} - (\beta_0^{(1B)} + \sum_{j=1}^p \beta_j^{(1B)} Z_j^{(1B)})}{\sigma_{1B}} - \frac{\sigma_{1B}\Phi^{-1}(t)}{\sigma_{1A}}\right)^2\right) \\
\frac{\partial ROC_{1,Z}(t)}{\partial \beta_j^{(1B)}} &= \frac{z_j^{(1B)}\sqrt{2}}{2\sqrt{\pi}\sigma_{1B}} \exp\left(-\frac{1}{2}\left(\frac{\beta_0^{(1A)} + \sum_{j=1}^p \beta_j^{(1A)} Z_j^{(1A)} - (\beta_0^{(1B)} + \sum_{j=1}^p \beta_j^{(1B)} Z_j^{(1B)})}{\sigma_{1B}} - \frac{\sigma_{1B}\Phi^{-1}(t)}{\sigma_{1A}}\right)^2\right) \\
\frac{\partial ROC_{1,Z}(t)}{\partial \sigma_{1A}} &= \frac{-\sigma_{1B}\Phi^{-1}(t)}{\sqrt{2\pi}\sigma_{1A}^2} \exp\left(-\frac{1}{2}\left(\frac{\beta_0^{(1A)} + \sum_{j=1}^p \beta_j^{(1A)} Z_j^{(1A)} - (\beta_0^{(1B)} + \sum_{j=1}^p \beta_j^{(1B)} Z_j^{(1B)})}{\sigma_{1B}} - \frac{\sigma_{1B}\Phi^{-1}(t)}{\sigma_{1A}}\right)^2\right) \\
\frac{\partial ROC_{1,Z}(t)}{\partial \sigma_{1B}} &= \frac{1}{3\pi\sqrt{2}} \exp\left(-\frac{1}{2}\left(\frac{\beta_0^{(1A)} + \sum_{j=1}^p \beta_j^{(1A)} Z_j^{(1A)} - (\beta_0^{(1B)} + \sum_{j=1}^p \beta_j^{(1B)} Z_j^{(1B)})}{\sigma_{1B}} - \frac{\sigma_{1B}\Phi^{-1}(t)}{\sigma_{1A}}\right)^2\right) \\
&\quad \times \left(\frac{\beta_0^{(1A)} + \sum_{j=1}^p \beta_j^{(1A)} Z_j^{(1A)} - (\beta_0^{(1B)} + \sum_{j=1}^p \beta_j^{(1B)} Z_j^{(1B)})}{\sigma_{1B}^2} + \frac{\Phi^{-1}(t)}{\sigma_{1A}}\right)
\end{aligned}$$

## 2 Figure: Box-Cox-based ROC curves for the prostate cancer data

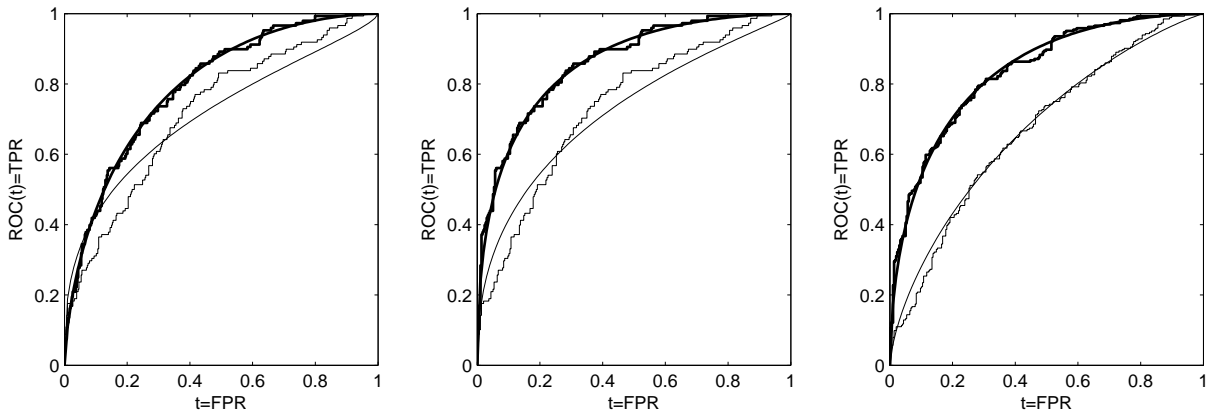

Figure 1: ROC estimates obtained from empirical-based and Box-Cox approaches for PSA alone (thin line) and the combined biomarker values (thick line). Left to right (i.e., scenarios (1) to (3)) for the empirical-based approach: ( $AUC_{PSA} = 0.7185$ ,  $AUC_C = 0.7933$ ), ( $AUC_{PSA} = 0.7347$ ,  $AUC_C = 0.8620$ ), ( $AUC_{PSA} = 0.6682$ ,  $AUC_C = 0.8342$ ). Left to right (i.e., scenarios (1) to (3)) for the Box-Cox approach: ( $AUC_{PSA} = 0.7118$ ,  $AUC_C = 0.7946$ ), ( $AUC_{PSA} = 0.7242$ ,  $AUC_C = 0.8597$ ), ( $AUC_{PSA} = 0.6728$ ,  $AUC_C = 0.8345$ ).

## Web-Appendix C (Additional Simulation results)

Table 9: Comparison of sizes of BTI and BTII confidence intervals by Qin et al. (2006). Simulation results of 1000 replications for the scenario in which data representing diseased and healthy individuals are generated by the same bivariate normal distributions (valid null hypothesis since  $ROC_1(t) = ROC_2(t)$ ). The data are generated such that  $AUC_1 = AUC_2 = 0.6, 0.7$ , and  $0.8$ . Sample sizes explored are  $(100, 100)$ ,  $(200, 200)$  and  $(100, 200)$ . Correlation is set equal to  $\rho = 0.2, 0.4, 0.6$  for the data of both the healthy and diseased individuals.

|            |        | Size results    |           |           |           |           |           |           |           |           |  |
|------------|--------|-----------------|-----------|-----------|-----------|-----------|-----------|-----------|-----------|-----------|--|
| $n_A, n_B$ | $\rho$ | $AUC_1 = AUC_2$ | BTI       |           |           |           | BTII      |           |           |           |  |
|            |        |                 | $t = 0.2$ | $t = 0.4$ | $t = 0.6$ | $t = 0.8$ | $t = 0.2$ | $t = 0.4$ | $t = 0.6$ | $t = 0.8$ |  |
| 100, 100   | 0.2    | 0.6             | 0.032     | 0.064     | 0.052     | 0.049     | 0.031     | 0.042     | 0.038     | 0.035     |  |
|            |        | 0.7             | 0.046     | 0.045     | 0.042     | 0.030     | 0.029     | 0.038     | 0.027     | 0.018     |  |
|            |        | 0.8             | 0.029     | 0.031     | 0.031     | 0.017     | 0.021     | 0.025     | 0.023     | 0.008     |  |
|            | 0.4    | 0.6             | 0.048     | 0.059     | 0.040     | 0.040     | 0.034     | 0.047     | 0.029     | 0.024     |  |
|            |        | 0.7             | 0.045     | 0.046     | 0.039     | 0.031     | 0.030     | 0.033     | 0.025     | 0.017     |  |
|            |        | 0.8             | 0.030     | 0.035     | 0.025     | 0.021     | 0.020     | 0.022     | 0.020     | 0.008     |  |
|            | 0.6    | 0.6             | 0.039     | 0.052     | 0.035     | 0.031     | 0.023     | 0.036     | 0.025     | 0.020     |  |
|            |        | 0.7             | 0.035     | 0.044     | 0.041     | 0.027     | 0.026     | 0.027     | 0.017     | 0.012     |  |
|            |        | 0.8             | 0.032     | 0.027     | 0.026     | 0.013     | 0.023     | 0.017     | 0.015     | 0.004     |  |
| 200, 200   | 0.2    | 0.6             | 0.060     | 0.047     | 0.057     | 0.041     | 0.048     | 0.039     | 0.052     | 0.036     |  |
|            |        | 0.7             | 0.054     | 0.052     | 0.048     | 0.042     | 0.046     | 0.040     | 0.040     | 0.033     |  |
|            |        | 0.8             | 0.051     | 0.049     | 0.043     | 0.031     | 0.043     | 0.040     | 0.033     | 0.020     |  |
|            | 0.4    | 0.6             | 0.0470    | 0.043     | 0.044     | 0.032     | 0.037     | 0.043     | 0.039     | 0.025     |  |
|            |        | 0.7             | 0.0470    | 0.046     | 0.047     | 0.034     | 0.039     | 0.043     | 0.036     | 0.030     |  |
|            |        | 0.8             | 0.0470    | 0.054     | 0.035     | 0.025     | 0.029     | 0.044     | 0.027     | 0.018     |  |
|            | 0.6    | 0.6             | 0.0360    | 0.046     | 0.052     | 0.028     | 0.026     | 0.034     | 0.035     | 0.027     |  |
|            |        | 0.7             | 0.0450    | 0.043     | 0.041     | 0.035     | 0.032     | 0.037     | 0.030     | 0.025     |  |
|            |        | 0.8             | 0.0390    | 0.046     | 0.036     | 0.023     | 0.037     | 0.031     | 0.026     | 0.012     |  |
| 100, 200   | 0.2    | 0.6             | 0.043     | 0.051     | 0.052     | 0.054     | 0.039     | 0.036     | 0.038     | 0.037     |  |
|            |        | 0.7             | 0.043     | 0.046     | 0.038     | 0.036     | 0.031     | 0.036     | 0.035     | 0.023     |  |
|            |        | 0.8             | 0.051     | 0.032     | 0.033     | 0.026     | 0.037     | 0.030     | 0.029     | 0.013     |  |
|            | 0.4    | 0.6             | 0.040     | 0.034     | 0.044     | 0.043     | 0.033     | 0.025     | 0.034     | 0.028     |  |
|            |        | 0.7             | 0.038     | 0.042     | 0.039     | 0.034     | 0.030     | 0.031     | 0.032     | 0.021     |  |
|            |        | 0.8             | 0.048     | 0.030     | 0.032     | 0.027     | 0.034     | 0.021     | 0.023     | 0.015     |  |
|            | 0.6    | 0.6             | 0.035     | 0.030     | 0.040     | 0.032     | 0.027     | 0.021     | 0.028     | 0.018     |  |
|            |        | 0.7             | 0.043     | 0.039     | 0.039     | 0.025     | 0.028     | 0.020     | 0.022     | 0.013     |  |
|            |        | 0.8             | 0.054     | 0.026     | 0.036     | 0.016     | 0.039     | 0.016     | 0.019     | 0.006     |  |

Table 10: Comparison of sizes of BTI and BTII confidence intervals by Qin et al. (2006). Simulation results of 1000 replications for the scenario in which data representing diseased and healthy individuals are generated by the same bivariate gamma distributions (valid null hypothesis since  $ROC_1(t) = ROC_2(t)$ ). The data are generated such that  $AUC_1 = AUC_2 = 0.6, 0.7$ , and  $0.8$ . Sample sizes explored are  $(100, 100)$ ,  $(200, 200)$  and  $(100, 200)$ . Correlation is set equal to  $\rho = 0.2, 0.4, 0.6$  for the data of both the healthy and diseased individuals.

|            |        | Size results    |           |           |           |           |           |           |           |           |  |
|------------|--------|-----------------|-----------|-----------|-----------|-----------|-----------|-----------|-----------|-----------|--|
| $n_A, n_B$ | $\rho$ | $AUC_1 = AUC_2$ | BTI       |           |           |           | BTII      |           |           |           |  |
|            |        |                 | $t = 0.2$ | $t = 0.4$ | $t = 0.6$ | $t = 0.8$ | $t = 0.2$ | $t = 0.4$ | $t = 0.6$ | $t = 0.8$ |  |
| 100, 100   | 0.2    | 0.6             | 0.038     | 0.040     | 0.038     | 0.042     | 0.027     | 0.032     | 0.028     | 0.032     |  |
|            |        | 0.7             | 0.043     | 0.042     | 0.044     | 0.035     | 0.035     | 0.029     | 0.027     | 0.028     |  |
|            |        | 0.8             | 0.042     | 0.045     | 0.035     | 0.022     | 0.030     | 0.033     | 0.025     | 0.010     |  |
|            | 0.4    | 0.6             | 0.033     | 0.041     | 0.040     | 0.041     | 0.019     | 0.024     | 0.028     | 0.029     |  |
|            |        | 0.7             | 0.039     | 0.040     | 0.041     | 0.037     | 0.021     | 0.022     | 0.026     | 0.022     |  |
|            |        | 0.8             | 0.043     | 0.031     | 0.033     | 0.017     | 0.031     | 0.021     | 0.020     | 0.010     |  |
|            | 0.6    | 0.6             | 0.033     | 0.049     | 0.036     | 0.036     | 0.022     | 0.034     | 0.022     | 0.023     |  |
|            |        | 0.7             | 0.037     | 0.035     | 0.032     | 0.026     | 0.023     | 0.026     | 0.017     | 0.012     |  |
|            |        | 0.8             | 0.029     | 0.036     | 0.030     | 0.008     | 0.017     | 0.023     | 0.012     | 0.002     |  |
| 200, 200   | 0.2    | 0.6             | 0.057     | 0.039     | 0.037     | 0.045     | 0.051     | 0.0310    | 0.036     | 0.035     |  |
|            |        | 0.7             | 0.049     | 0.035     | 0.036     | 0.039     | 0.042     | 0.0350    | 0.034     | 0.029     |  |
|            |        | 0.8             | 0.048     | 0.042     | 0.037     | 0.028     | 0.032     | 0.0410    | 0.032     | 0.017     |  |
|            | 0.4    | 0.6             | 0.042     | 0.041     | 0.047     | 0.040     | 0.028     | 0.0310    | 0.035     | 0.028     |  |
|            |        | 0.7             | 0.034     | 0.033     | 0.036     | 0.028     | 0.026     | 0.0280    | 0.020     | 0.022     |  |
|            |        | 0.8             | 0.037     | 0.046     | 0.034     | 0.026     | 0.028     | 0.0400    | 0.027     | 0.014     |  |
|            | 0.6    | 0.6             | 0.028     | 0.042     | 0.038     | 0.041     | 0.023     | 0.029     | 0.032     | 0.027     |  |
|            |        | 0.7             | 0.037     | 0.039     | 0.035     | 0.046     | 0.023     | 0.028     | 0.023     | 0.029     |  |
|            |        | 0.8             | 0.027     | 0.036     | 0.051     | 0.026     | 0.023     | 0.024     | 0.039     | 0.022     |  |
| 100, 200   | 0.2    | 0.6             | 0.043     | 0.049     | 0.048     | 0.052     | 0.034     | 0.036     | 0.043     | 0.041     |  |
|            |        | 0.7             | 0.048     | 0.041     | 0.048     | 0.040     | 0.040     | 0.036     | 0.034     | 0.025     |  |
|            |        | 0.8             | 0.049     | 0.037     | 0.036     | 0.021     | 0.035     | 0.030     | 0.030     | 0.014     |  |
|            | 0.4    | 0.6             | 0.041     | 0.047     | 0.035     | 0.034     | 0.034     | 0.028     | 0.027     | 0.017     |  |
|            |        | 0.7             | 0.038     | 0.045     | 0.039     | 0.037     | 0.024     | 0.033     | 0.026     | 0.026     |  |
|            |        | 0.8             | 0.042     | 0.039     | 0.022     | 0.021     | 0.027     | 0.020     | 0.021     | 0.010     |  |
|            | 0.6    | 0.6             | 0.034     | 0.040     | 0.046     | 0.039     | 0.024     | 0.029     | 0.037     | 0.026     |  |
|            |        | 0.7             | 0.039     | 0.034     | 0.029     | 0.026     | 0.026     | 0.022     | 0.021     | 0.015     |  |
|            |        | 0.8             | 0.037     | 0.033     | 0.036     | 0.016     | 0.022     | 0.023     | 0.015     | 0.007     |  |



Table 11: Power simulation results of 1000 replications for the normal setting (non-valid null hypothesis) under different scenarios. The BTI and BTII methods are considered. Sample sizes explored are (50, 50), (100, 100), and (200, 200). Correlation is set equal to  $\rho = 0.2, 0.4$ , and  $0.6$  for data of both the healthy and diseased individuals. The true difference  $ROC_2(t) - ROC_1(t)$  to be detected is denoted by  $d$ .

| Power results |        |            |            |            |            |            |            |            |            |
|---------------|--------|------------|------------|------------|------------|------------|------------|------------|------------|
| Normals       |        |            |            |            |            |            |            |            |            |
| BTI           |        |            |            |            | BTII       |            |            |            |            |
| $n_A, n_B$    | $\rho$ | $d = 0.20$ | $d = 0.15$ | $d = 0.10$ | $d = 0.05$ | $d = 0.20$ | $d = 0.15$ | $d = 0.10$ | $d = 0.05$ |
| 50, 50        | 0.2    | 0.518      | 0.415      | 0.285      | 0.100      | 0.504      | 0.421      | 0.256      | 0.085      |
|               | 0.4    | 0.574      | 0.454      | 0.294      | 0.097      | 0.568      | 0.436      | 0.269      | 0.087      |
|               | 0.6    | 0.636      | 0.504      | 0.319      | 0.105      | 0.644      | 0.490      | 0.292      | 0.083      |
| 100, 100      | 0.2    | 0.826      | 0.754      | 0.622      | 0.306      | 0.848      | 0.774      | 0.632      | 0.302      |
|               | 0.4    | 0.860      | 0.802      | 0.653      | 0.319      | 0.891      | 0.812      | 0.665      | 0.301      |
|               | 0.6    | 0.923      | 0.833      | 0.695      | 0.338      | 0.944      | 0.870      | 0.725      | 0.329      |
| 200, 200      | 0.2    | 0.984      | 0.966      | 0.906      | 0.646      | 0.987      | 0.972      | 0.925      | 0.689      |
|               | 0.4    | 0.995      | 0.972      | 0.930      | 0.667      | 0.997      | 0.984      | 0.936      | 0.703      |
|               | 0.6    | 1.000      | 0.989      | 0.952      | 0.705      | 1.000      | 0.996      | 0.962      | 0.749      |
| Gammass       |        |            |            |            |            |            |            |            |            |
| BTI           |        |            |            |            | BTII       |            |            |            |            |
| $n_A, n_B$    | $\rho$ | $d = 0.20$ | $d = 0.15$ | $d = 0.10$ | $d = 0.05$ | $d = 0.20$ | $d = 0.15$ | $d = 0.10$ | $d = 0.05$ |
| 50, 50        | 0.2    | 0.329      | 0.271      | 0.186      | 0.080      | 0.303      | 0.264      | 0.174      | 0.064      |
|               | 0.4    | 0.341      | 0.294      | 0.204      | 0.083      | 0.324      | 0.265      | 0.182      | 0.076      |
|               | 0.6    | 0.423      | 0.338      | 0.221      | 0.099      | 0.399      | 0.316      | 0.199      | 0.071      |
| 100, 100      | 0.2    | 0.562      | 0.518      | 0.376      | 0.194      | 0.560      | 0.509      | 0.372      | 0.176      |
|               | 0.4    | 0.619      | 0.535      | 0.405      | 0.228      | 0.617      | 0.537      | 0.408      | 0.221      |
|               | 0.6    | 0.743      | 0.623      | 0.445      | 0.217      | 0.754      | 0.624      | 0.445      | 0.194      |
| 200, 200      | 0.2    | 0.841      | 0.778      | 0.648      | 0.403      | 0.851      | 0.781      | 0.662      | 0.419      |
|               | 0.4    | 0.892      | 0.851      | 0.747      | 0.477      | 0.893      | 0.861      | 0.755      | 0.480      |
|               | 0.6    | 0.947      | 0.910      | 0.797      | 0.512      | 0.956      | 0.919      | 0.816      | 0.518      |
